# Supplementary material for: Genome-wide Identification of Gramineae Histone Modification Genes and their Potential Roles in Regulating Wheat and Maize Growth and Stress Responses
Source: Research Square preprint supplement (doi:10.21203/rs.3.rs-101516/v1), 2020-11-10

**Figure S8 Gene structure analysis of *HM* genes.**

Figure S8-1 Gene structure analysis of *TaSDG* and *TaPRMT* genes.


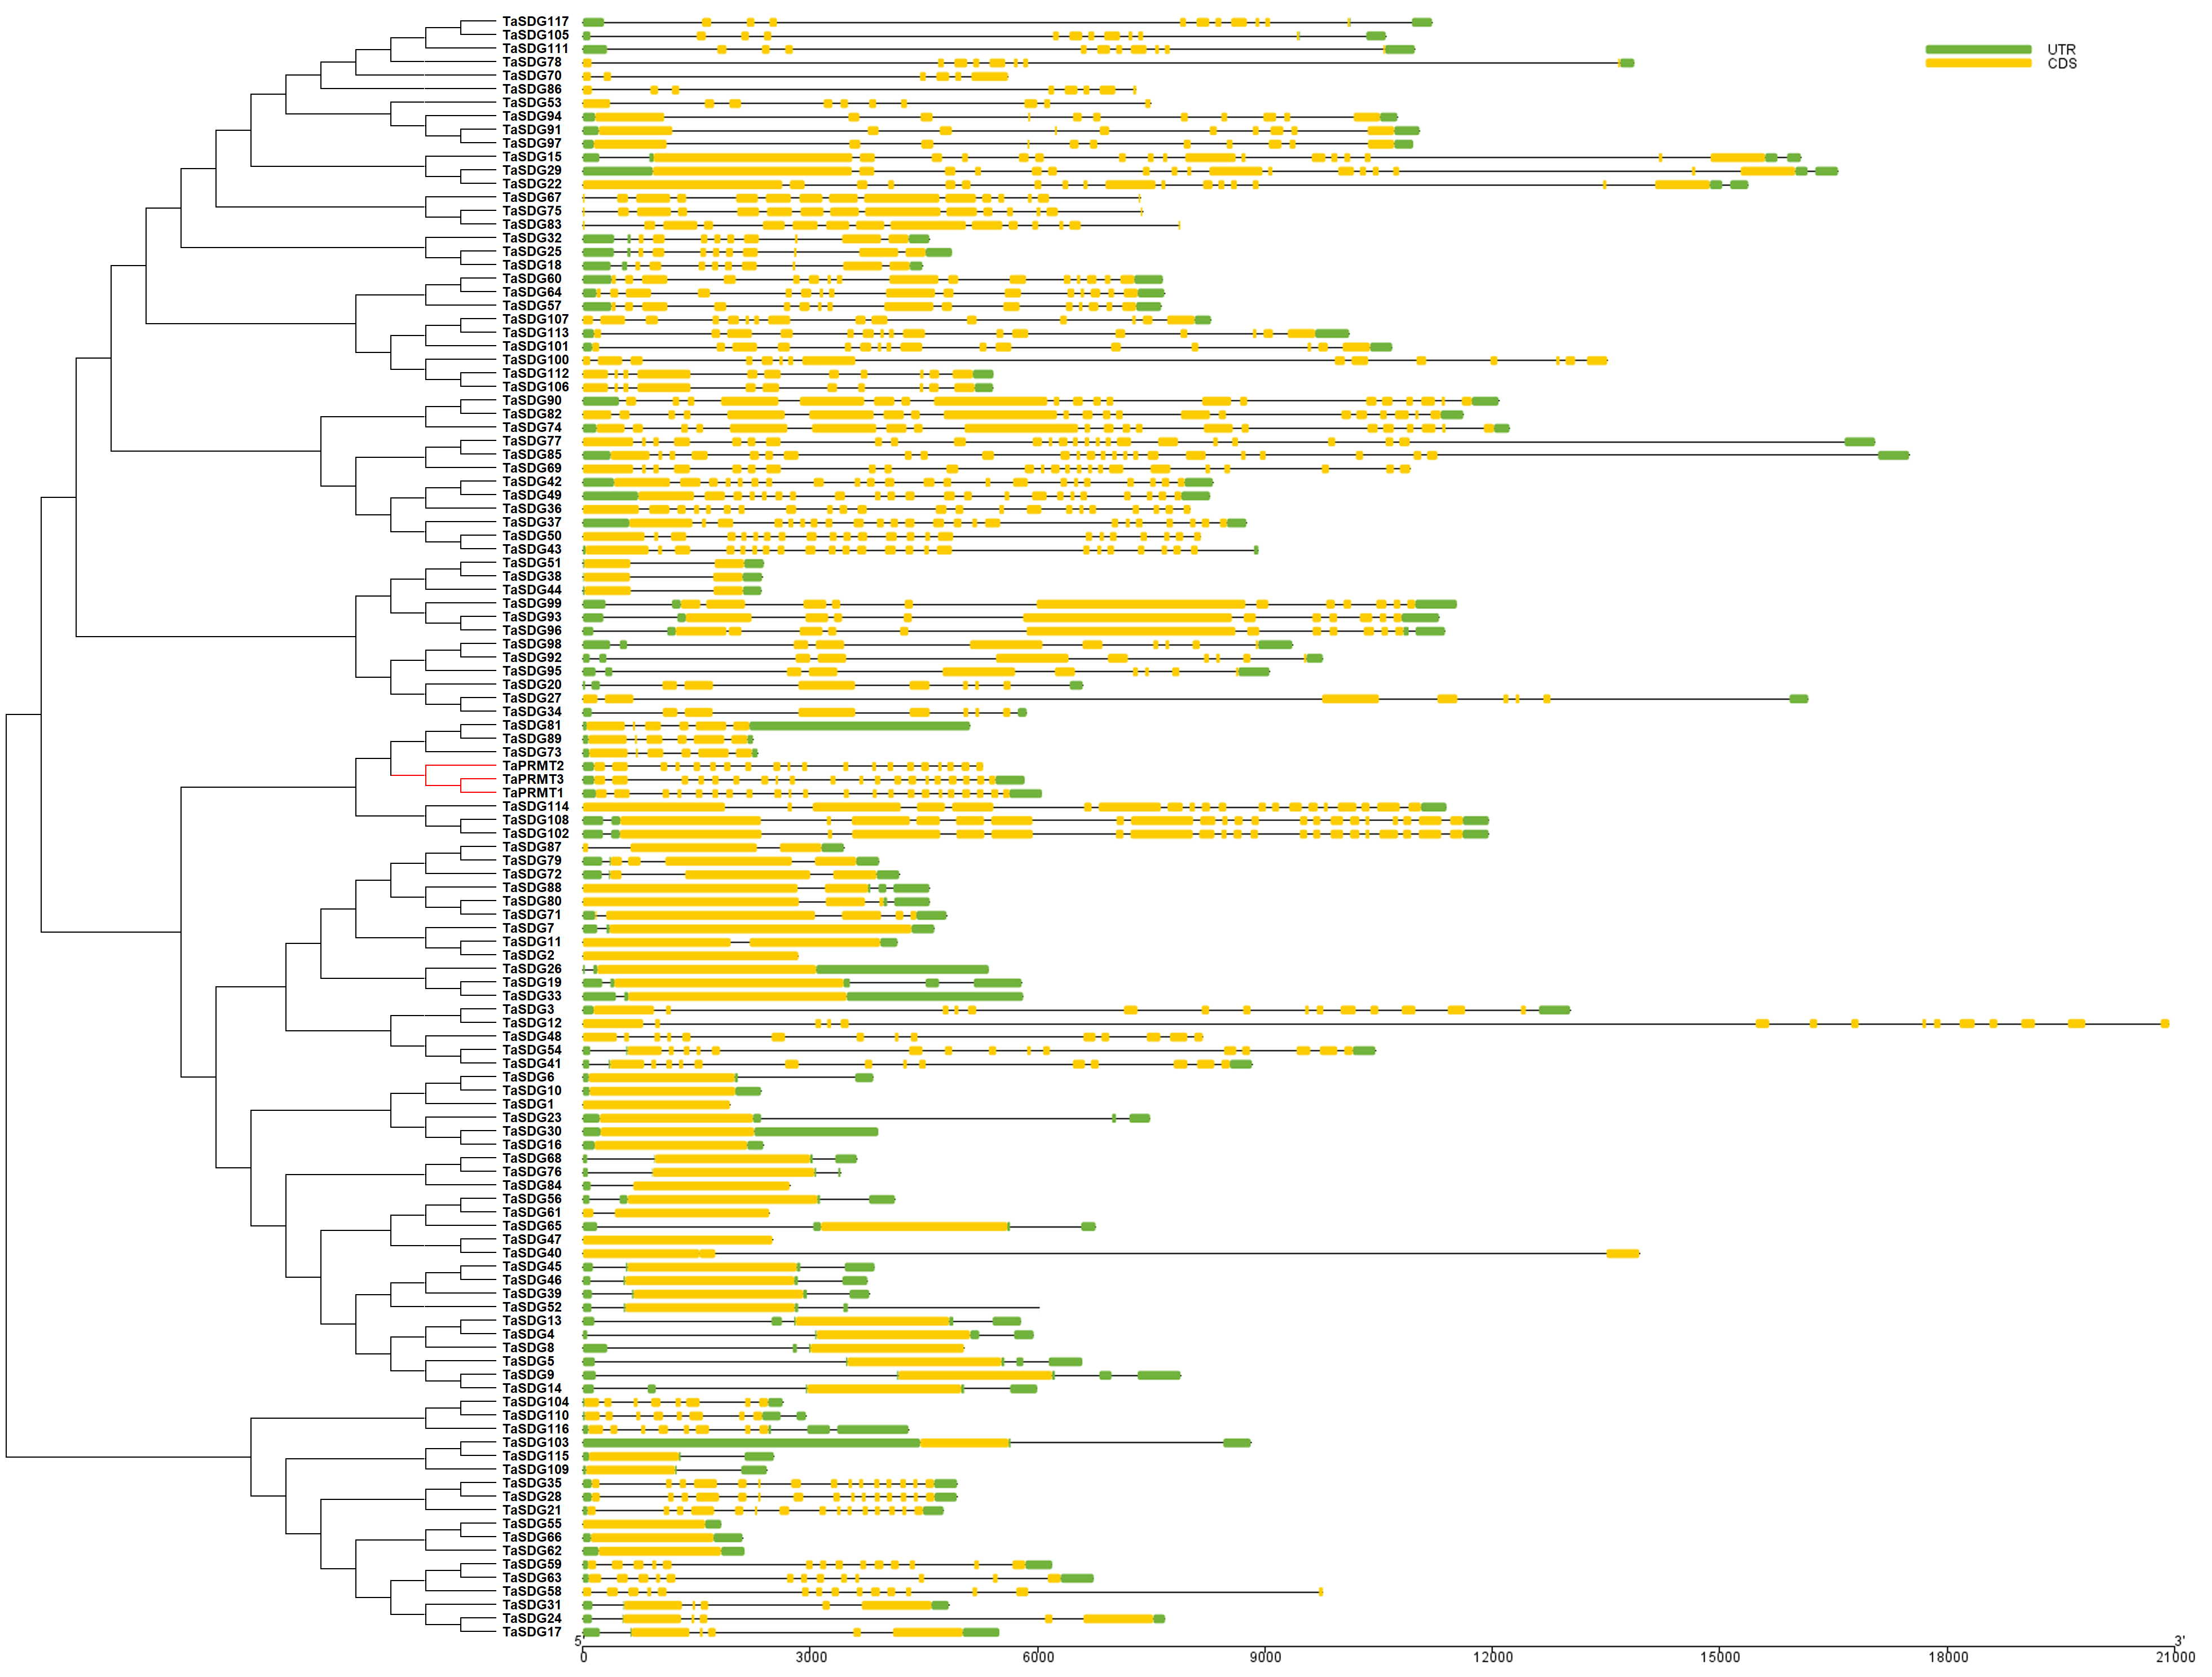


Figure S8-2 Gene structure analysis of *TaHDMA* and *TaJMJ* genes.


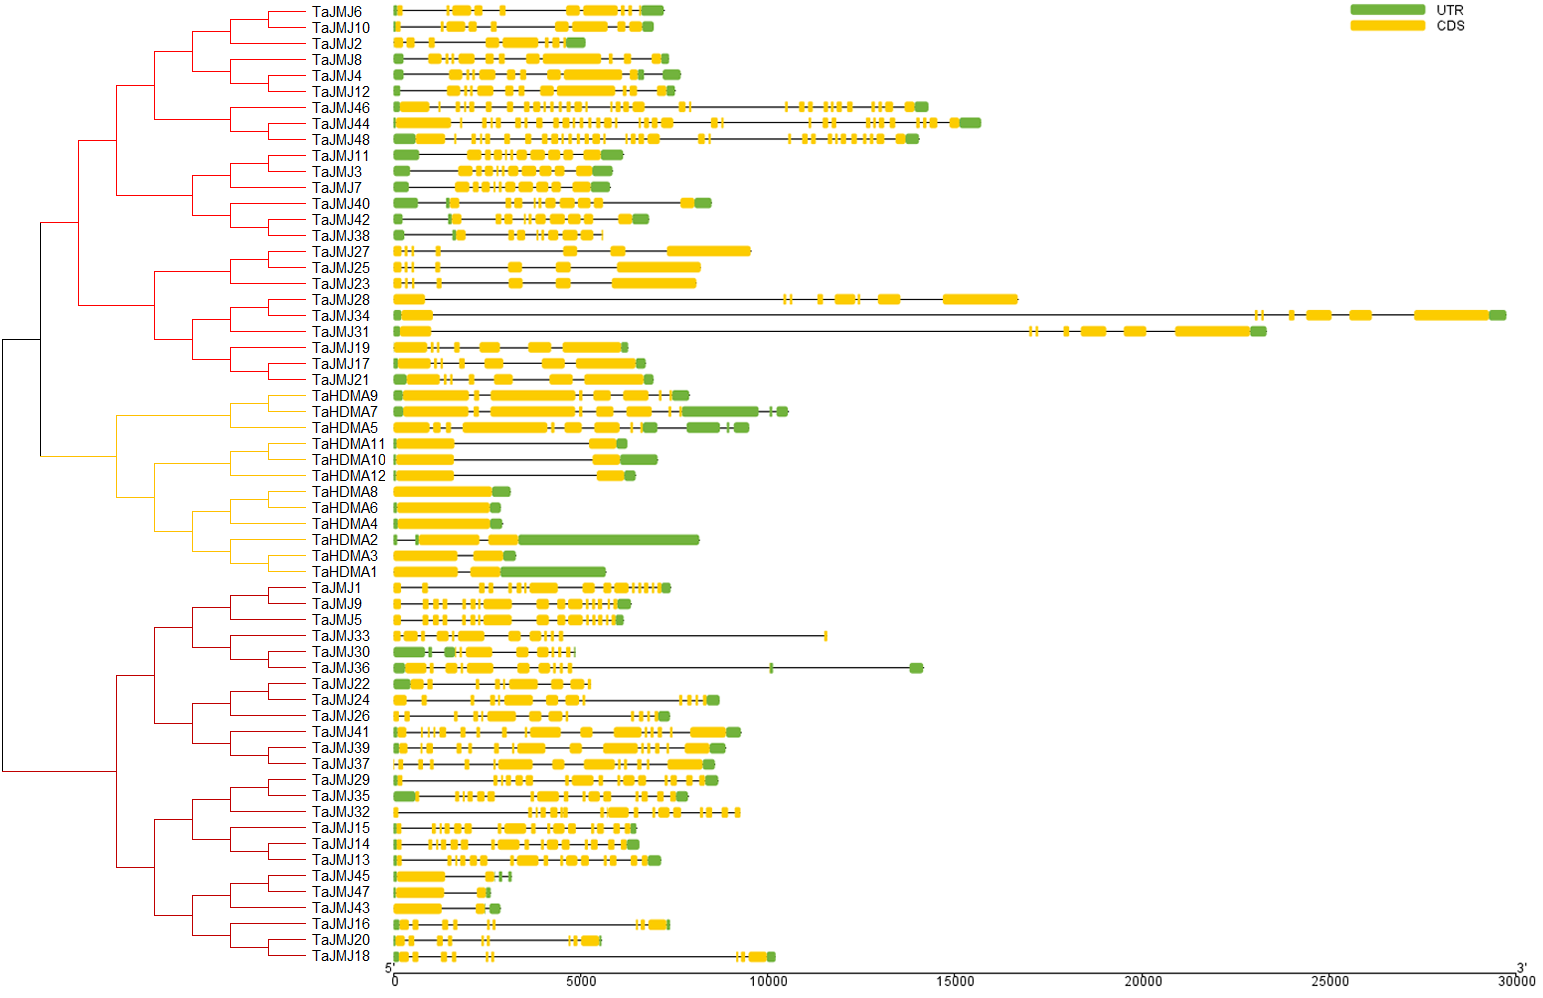


Figure S8-3 Gene structure analysis of *TaHAG,* *TaHAM*, *TaHAC* and *TaHAF* genes.


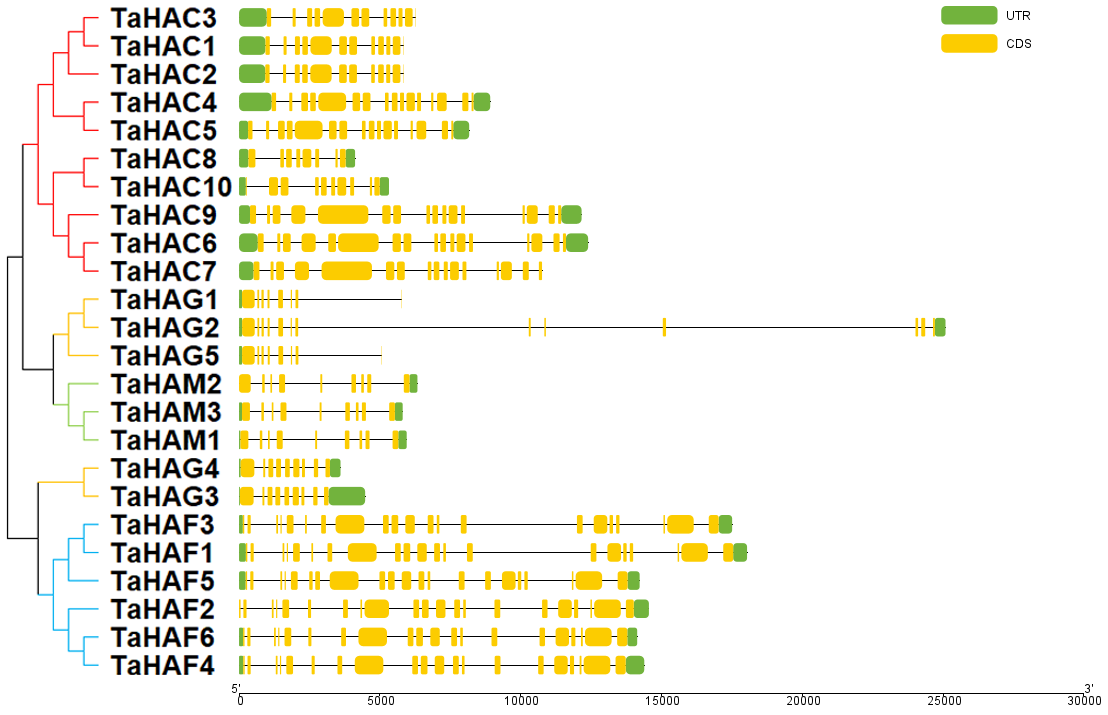


Figure S8-4 Gene structure analysis of *TaHDA,* *TaSRT* and *TaHDT* genes.


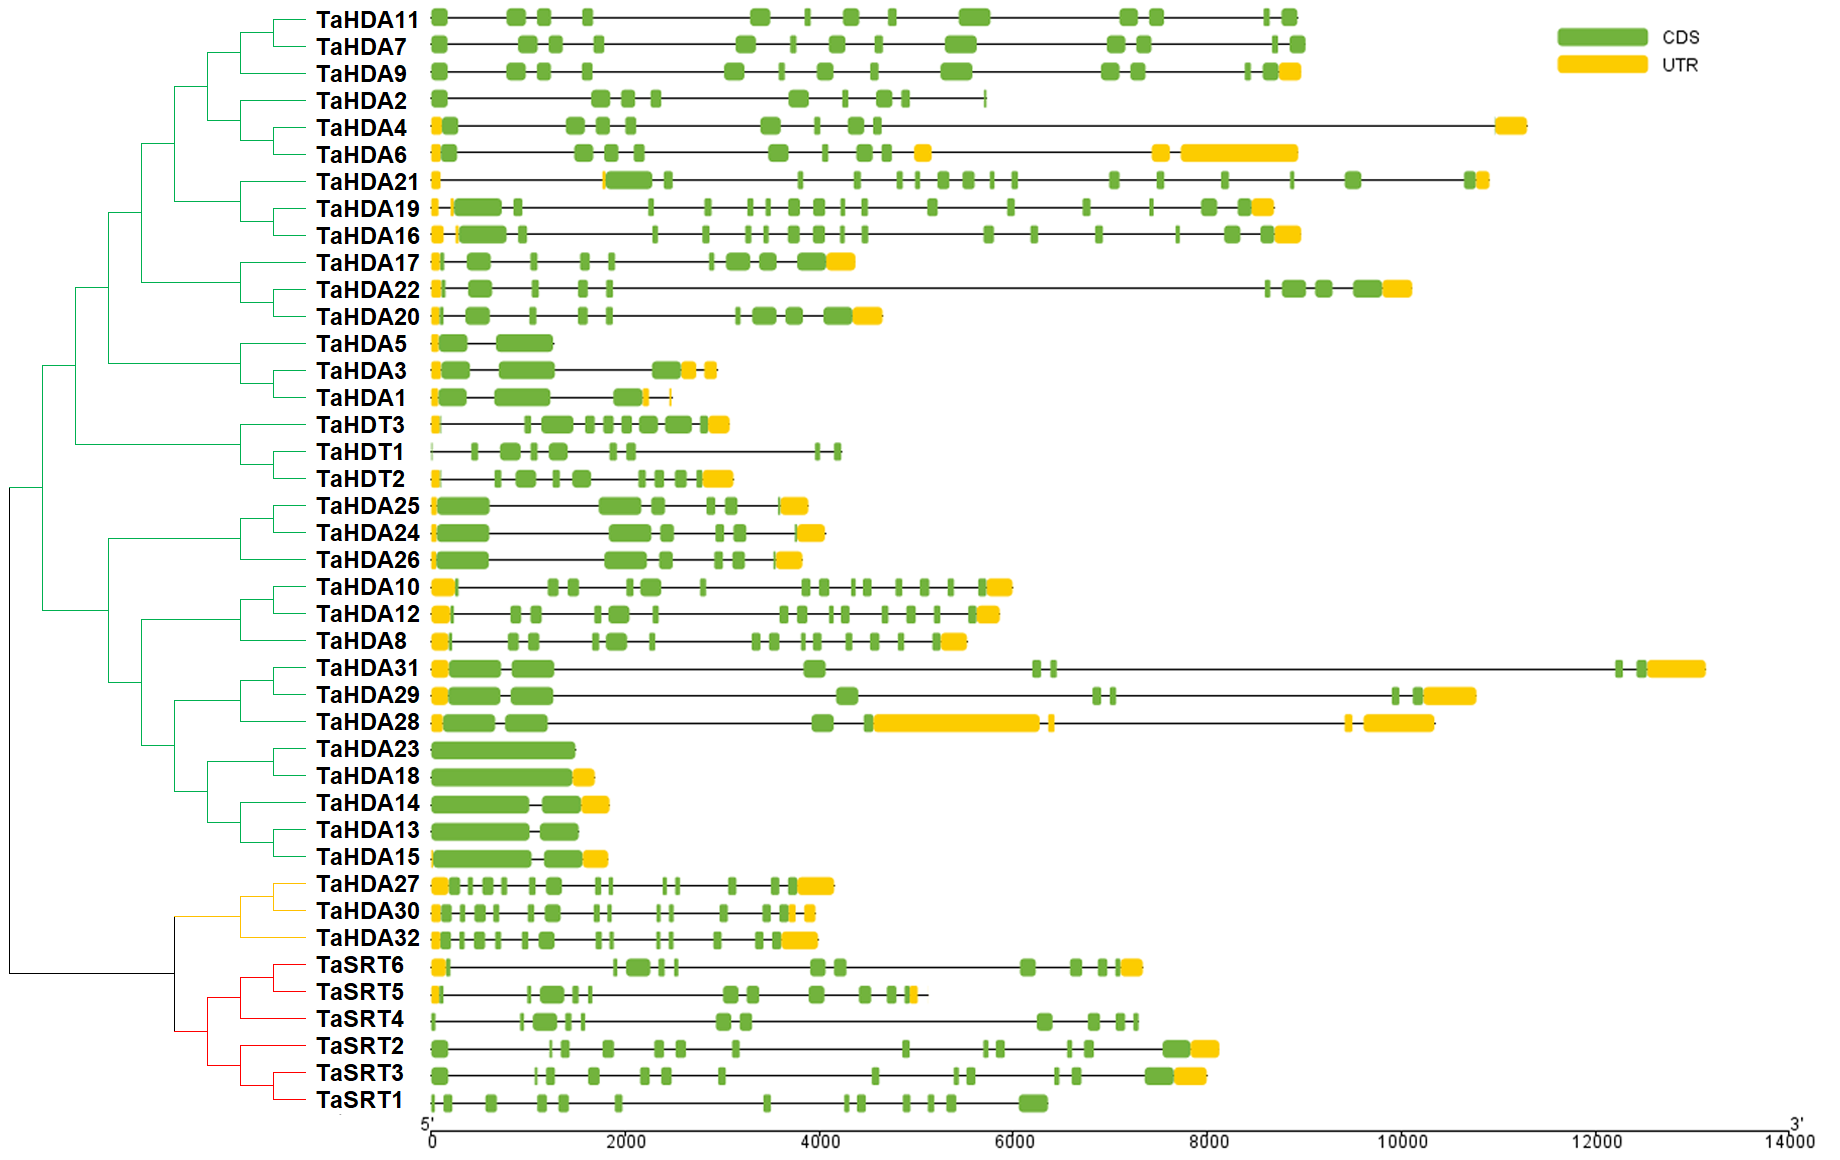


Figure S8-5 Gene structure analysis of *HvSDG* and *HvPRMT* genes.


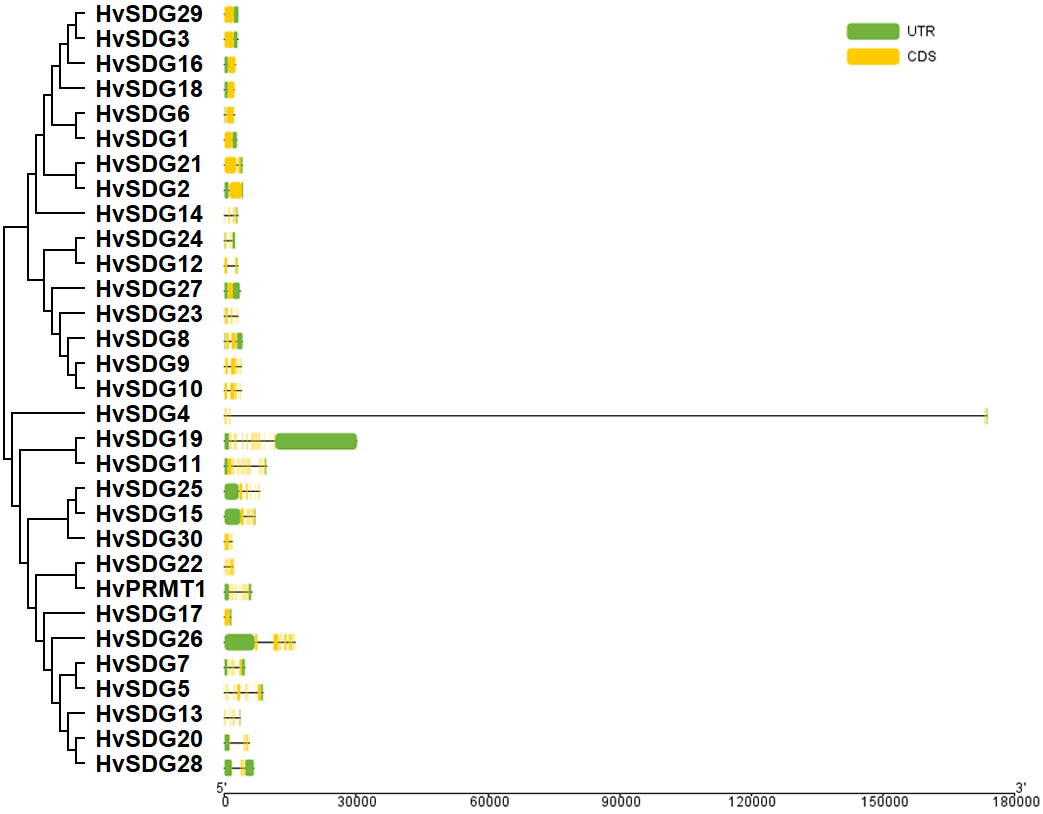


Figure S8-6 Gene structure analysis of *HvHDMA* and *HvJMJ* genes.


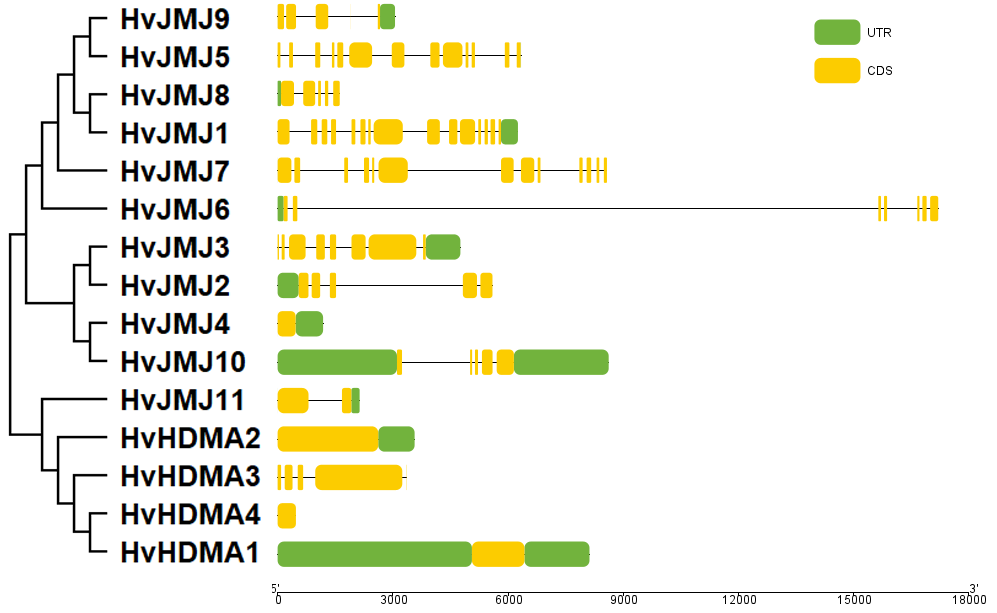


Figure S8-7 Gene structure analysis of *HvHAG,* *HvHAM*, *HvHAC* and *HvHAF* genes.


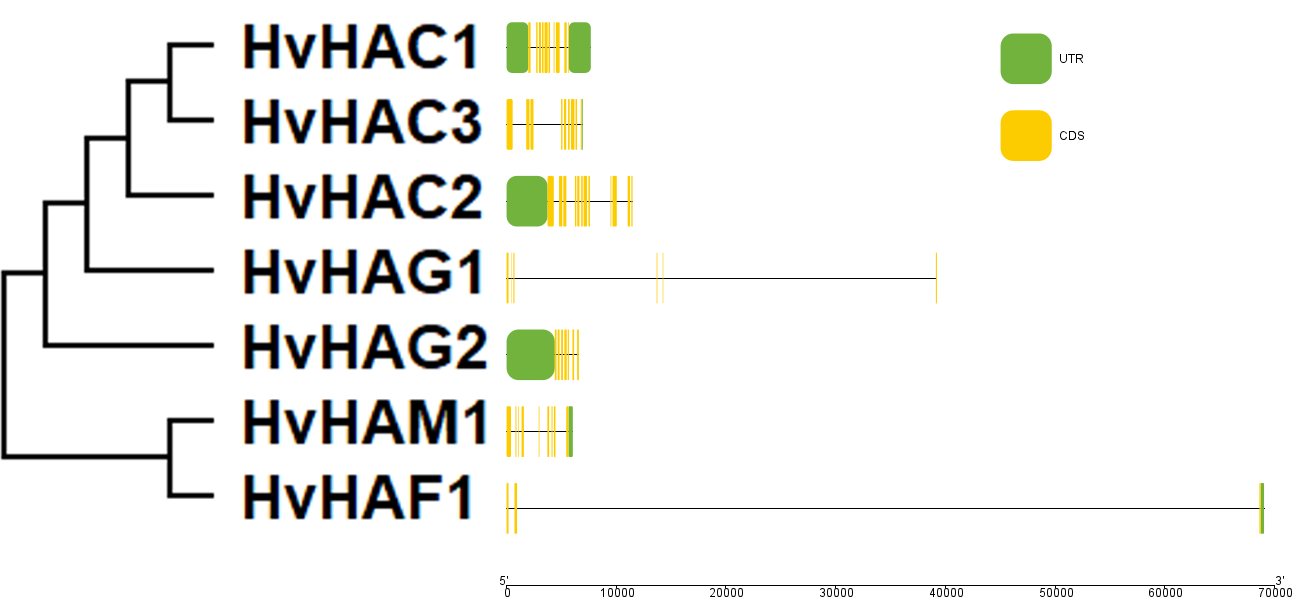


Figure S8-8 Gene structure analysis of *HvHDA,* *HvSRT* and *HvHDT* genes.


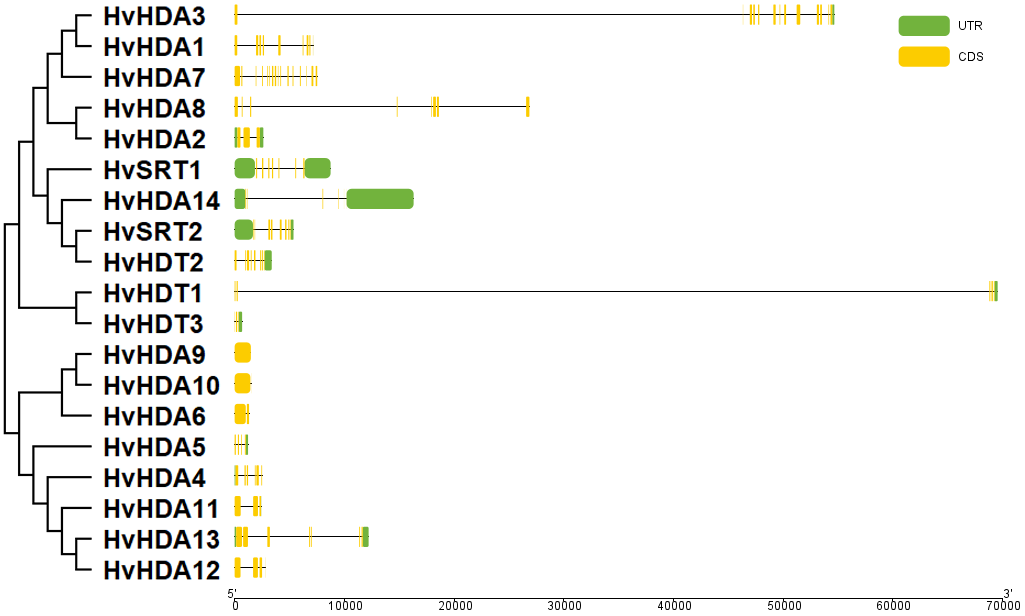


Figure S8-9 Gene structure analysis of *SbSDG* and *SbPRMT* genes.


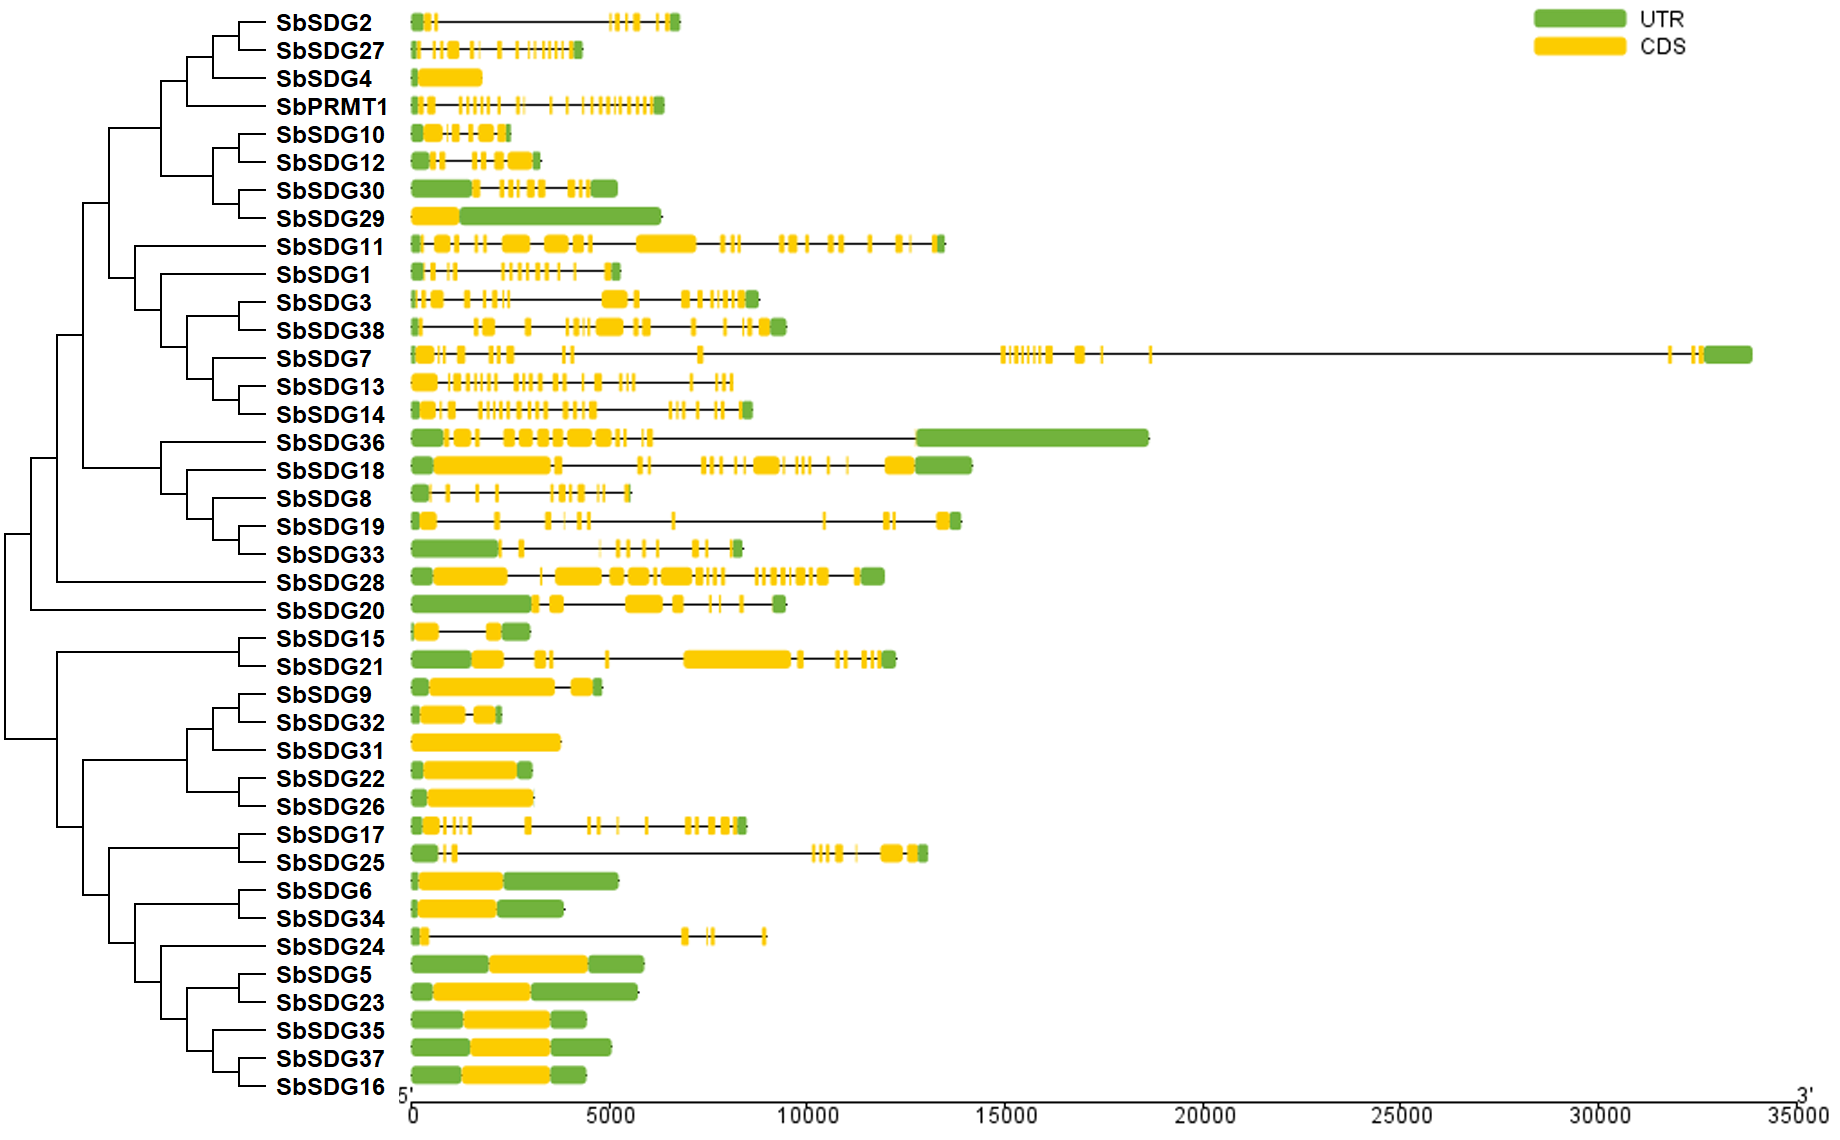


Figure S8-10 Gene structure analysis of *SbHDMA* and *SbJMJ* genes.


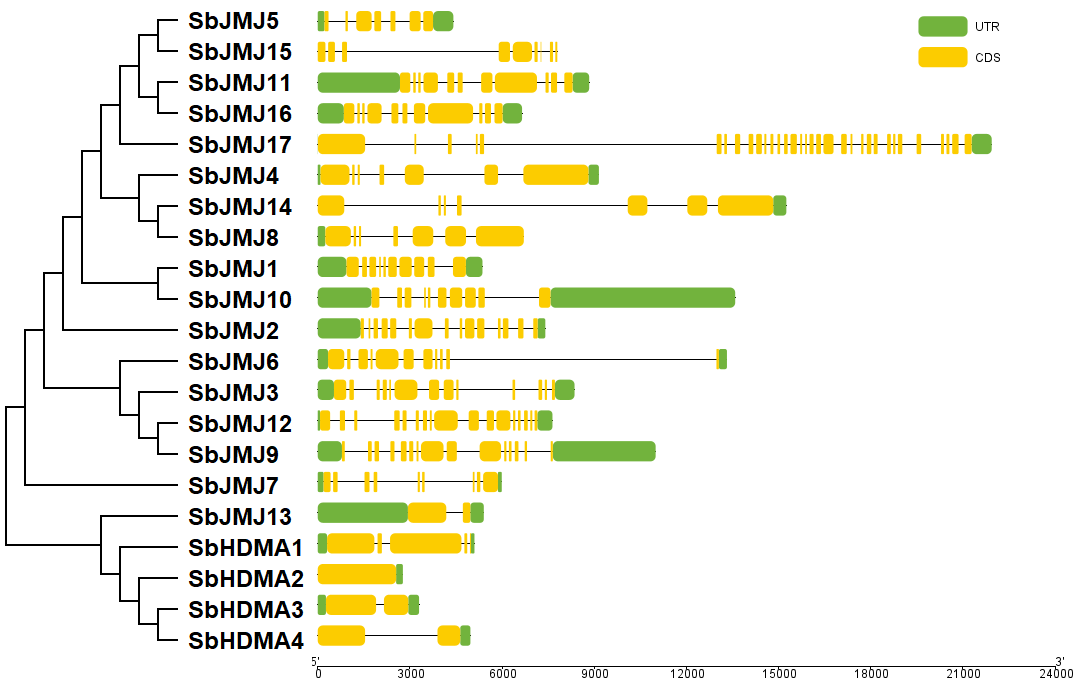


Figure S8-11 Gene structure analysis of *SbHAG,* *SbHAM*, *SbHAC* and *SbHAF* genes.


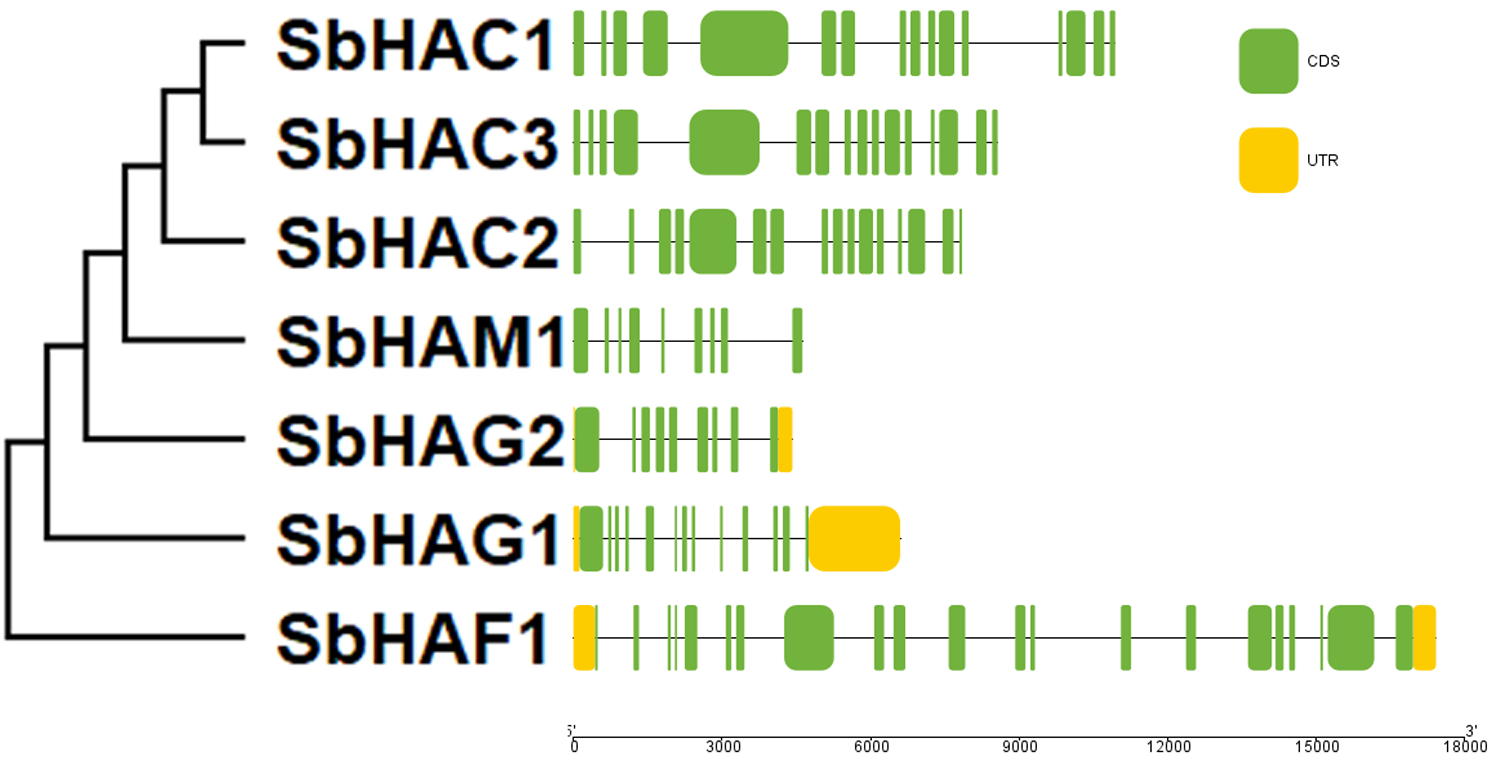


Figure S8-12 Gene structure analysis of *SbHDA,* *SbSRT* and *SbHDT* genes.


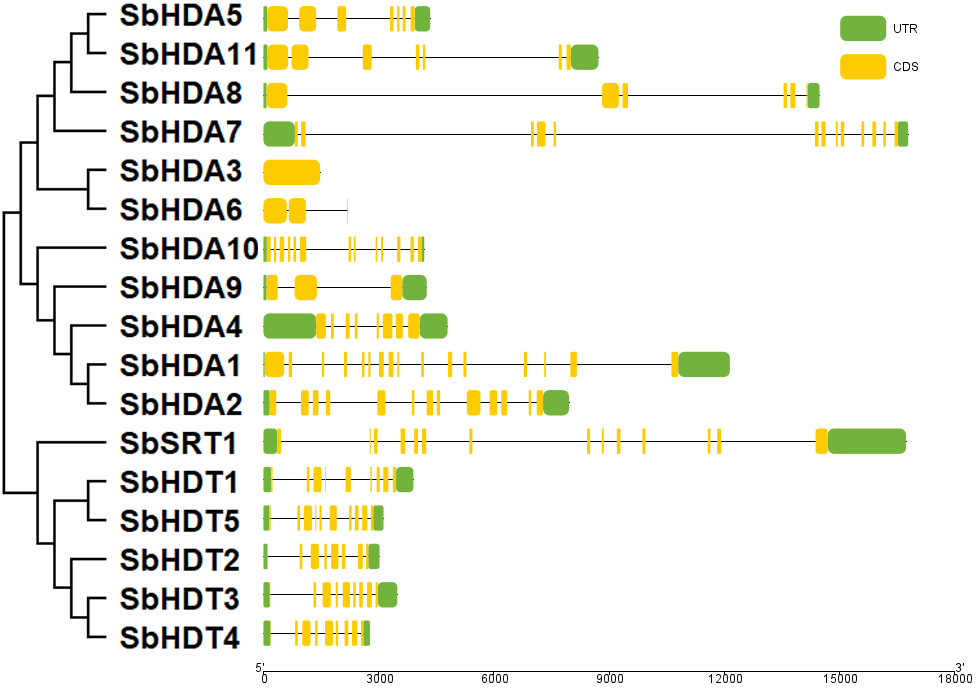


Figure S8-13 Gene structure analysis of *SvSDG* and *SvPRMT* genes.


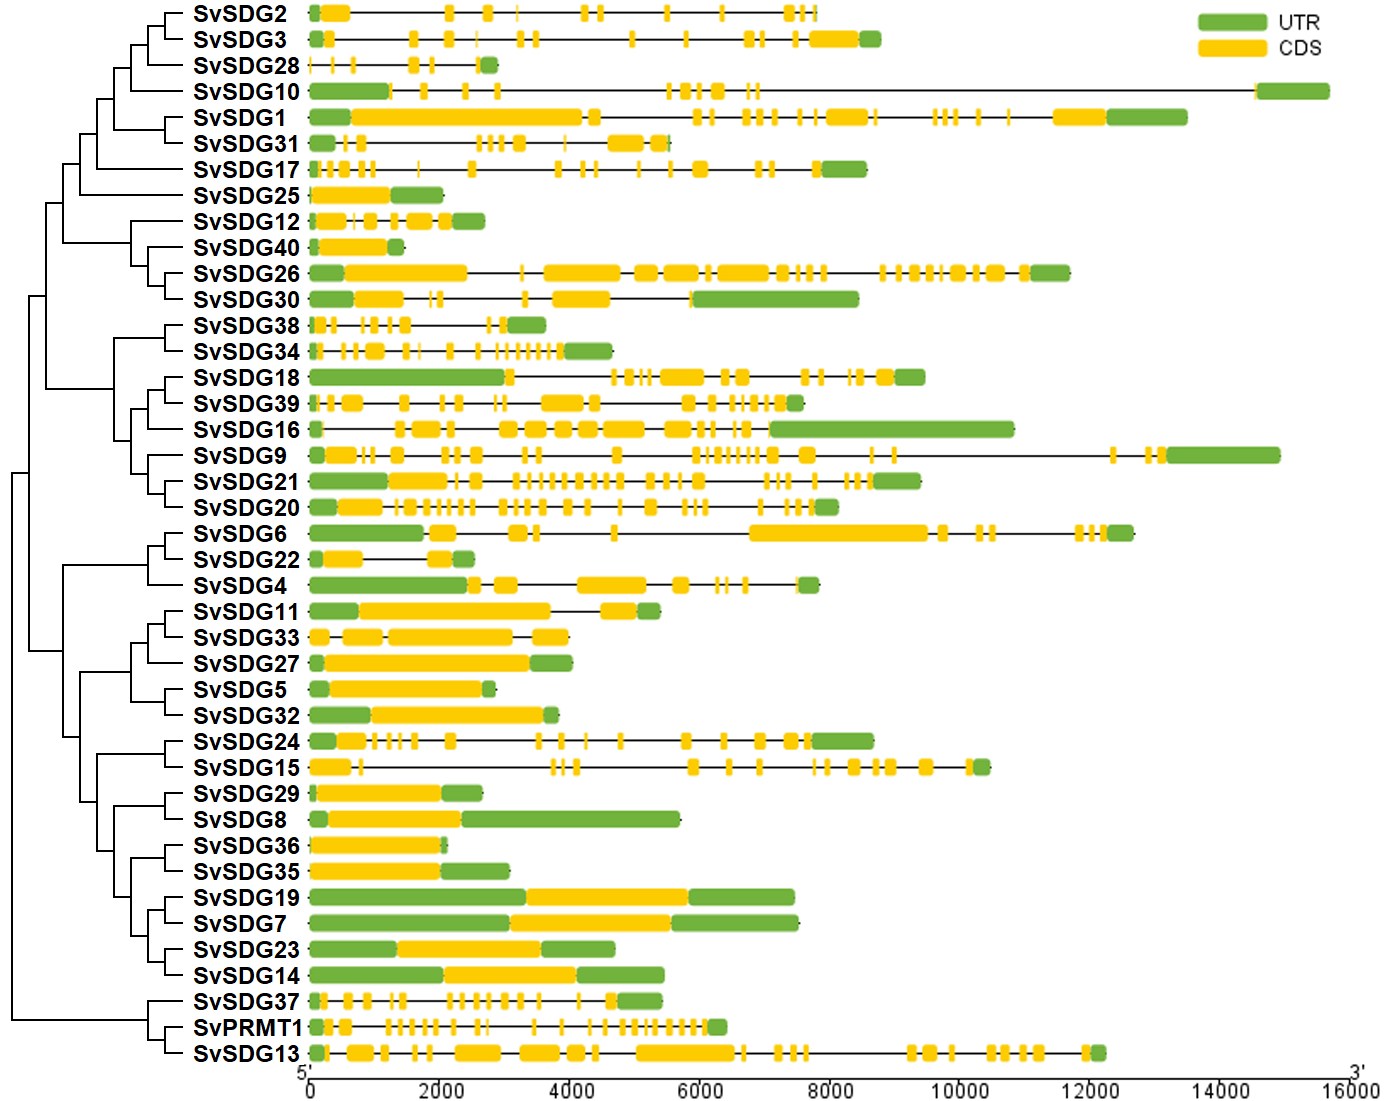


Figure S8-14 Gene structure analysis of *SvHDMA* and *SvJMJ* genes.


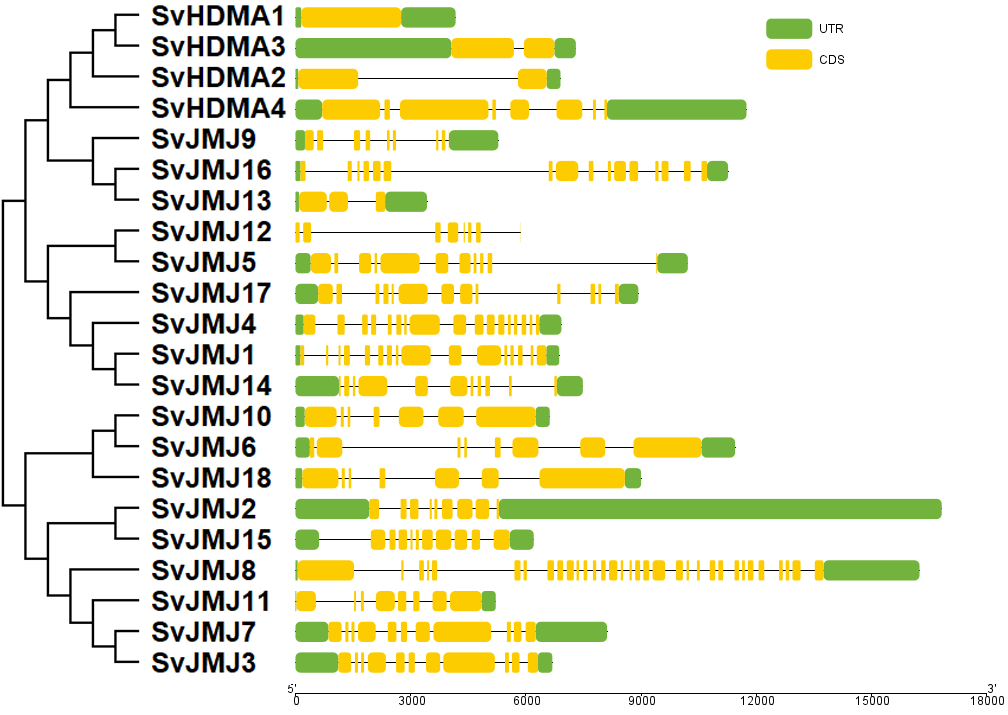


Figure S8-15 Gene structure analysis of *SvHAG,* *SvHAM*, *SvHAC* and *SvHAF* genes.


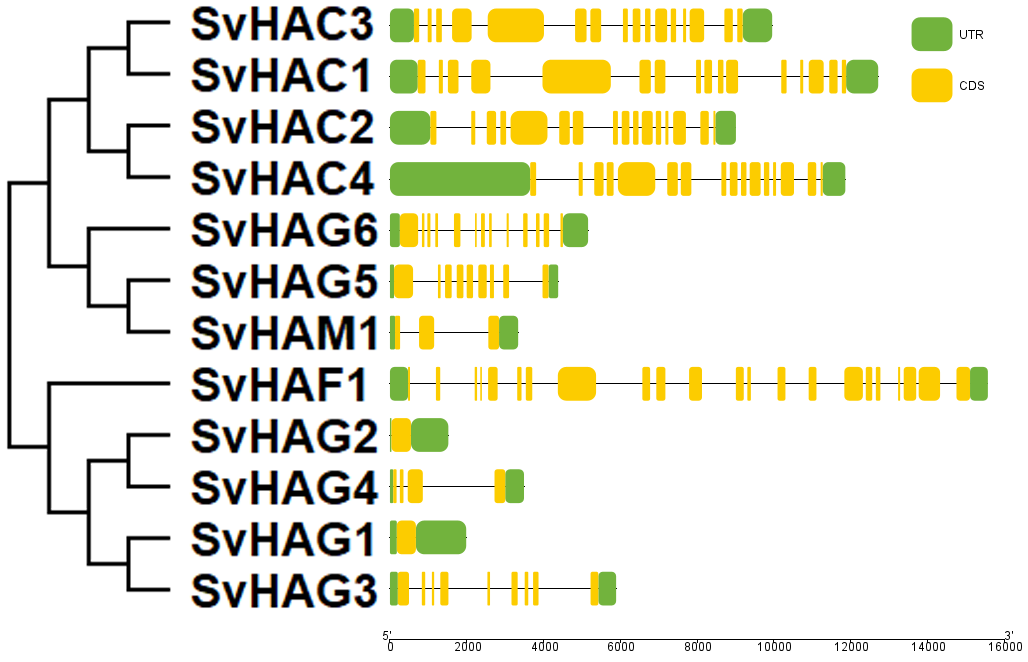


Figure S8-16 Gene structure analysis of *SvHDA,* *SvSRT* and *SvHDT* genes.


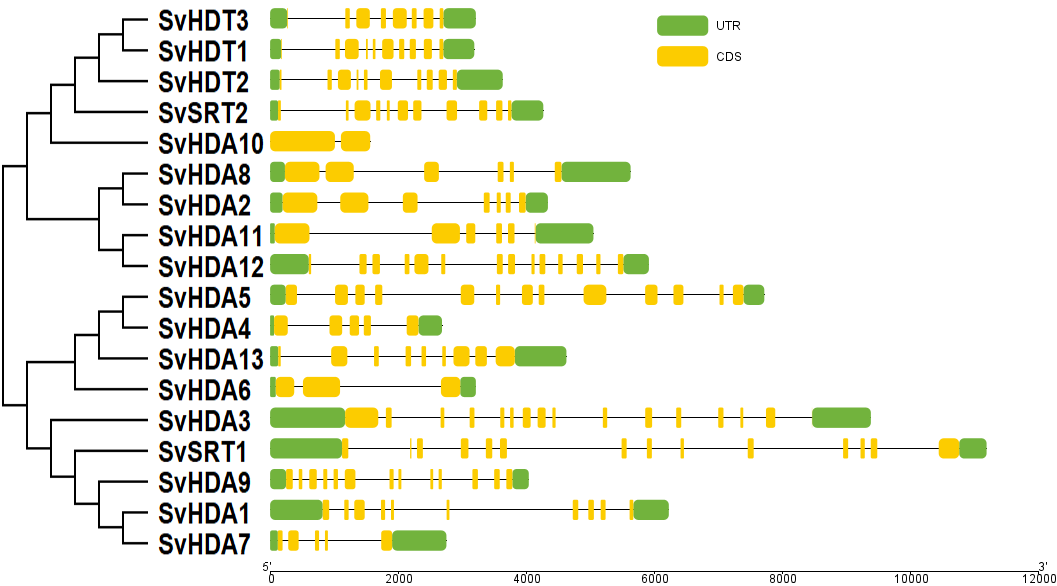


Figure S8-17 Gene structure analysis of *SiSDG* and *SiPRMT* genes.


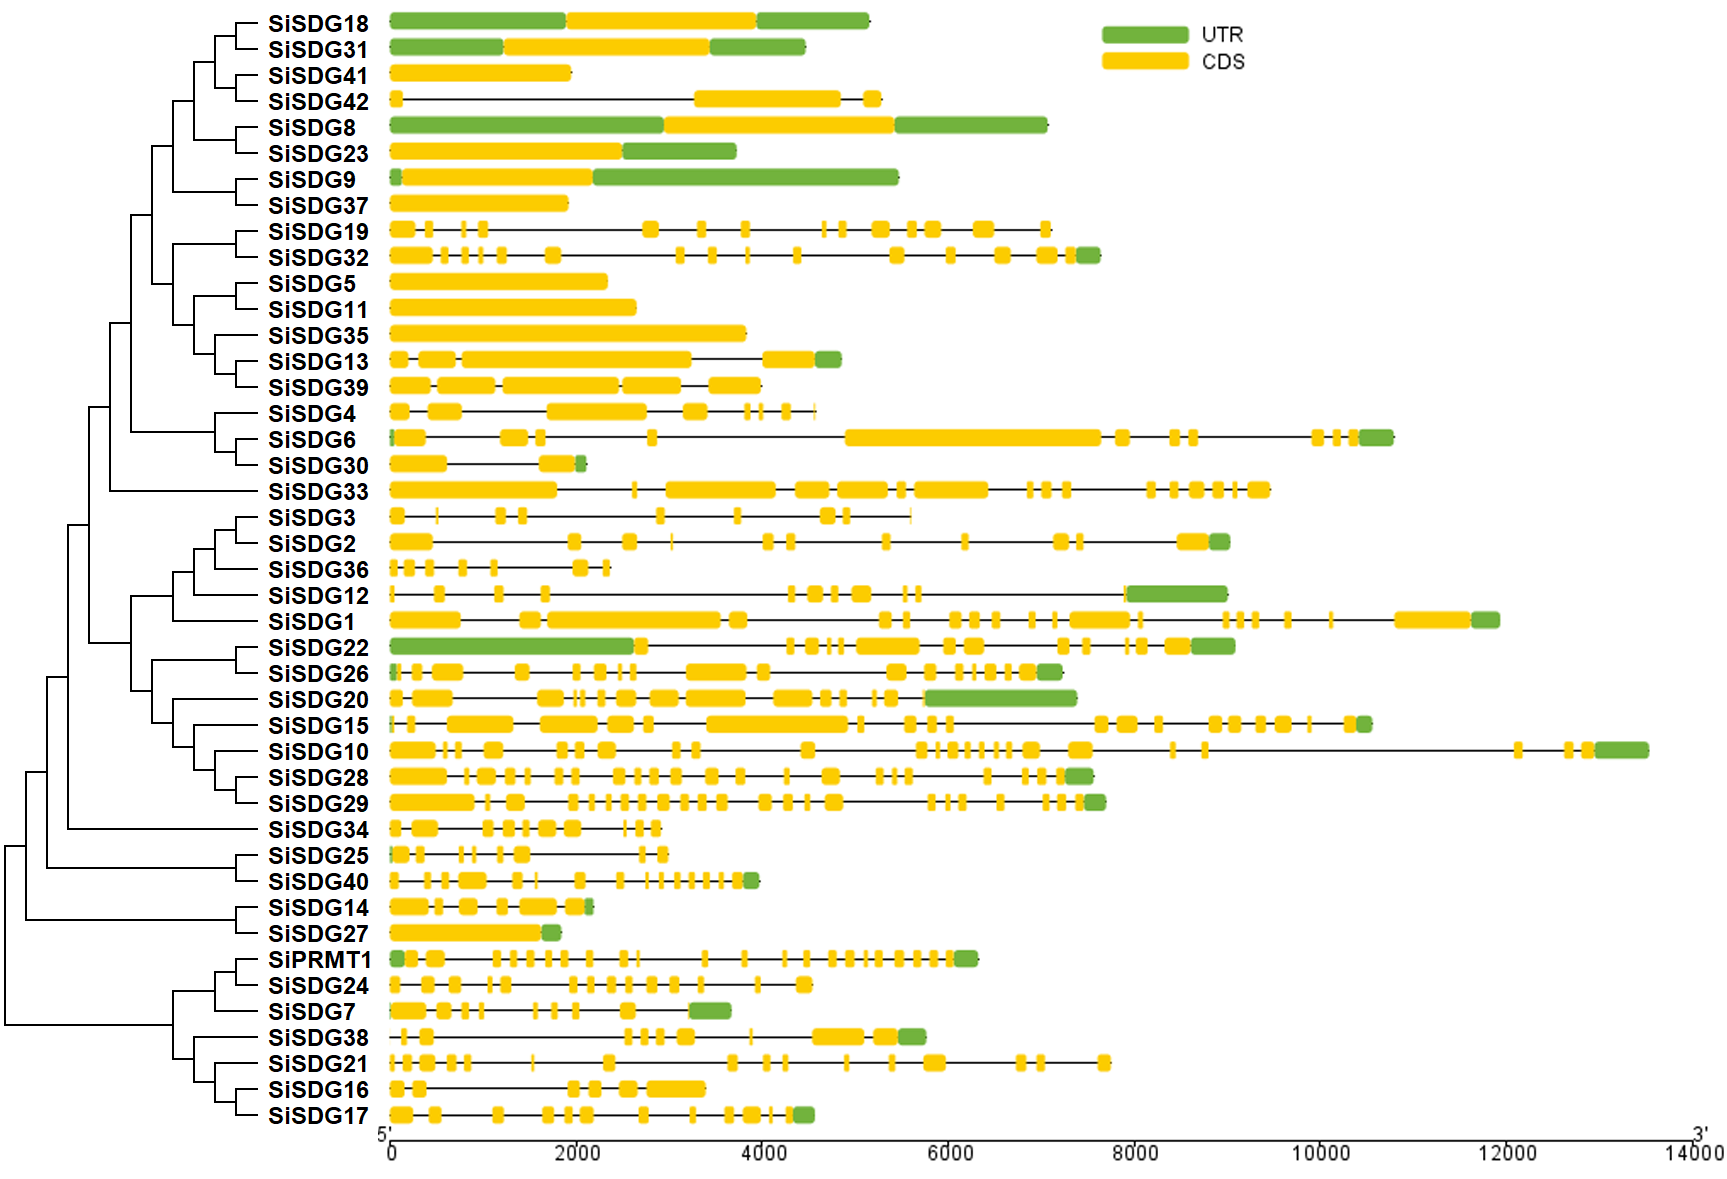


Figure S8-18 Gene structure analysis of *SiHDMA* and *SiJMJ* genes.


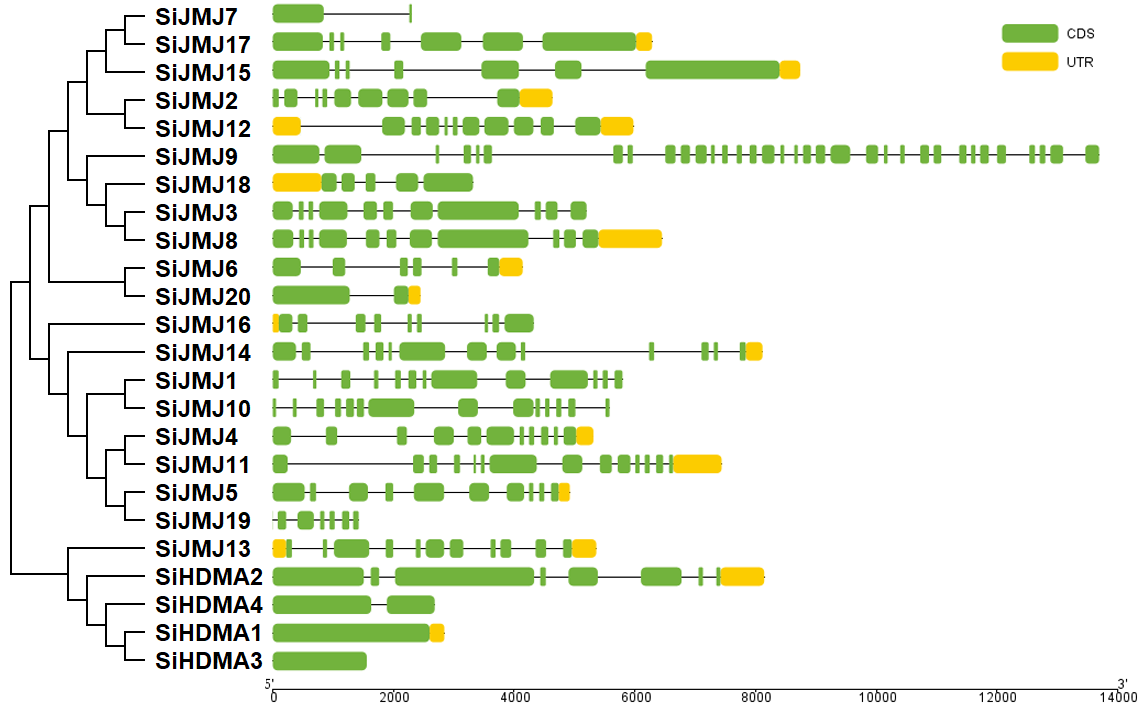


Figure S8-19 Gene structure analysis of *SiHAG,* *SiHAM*, *SiHAC* and *SiHAF* genes.


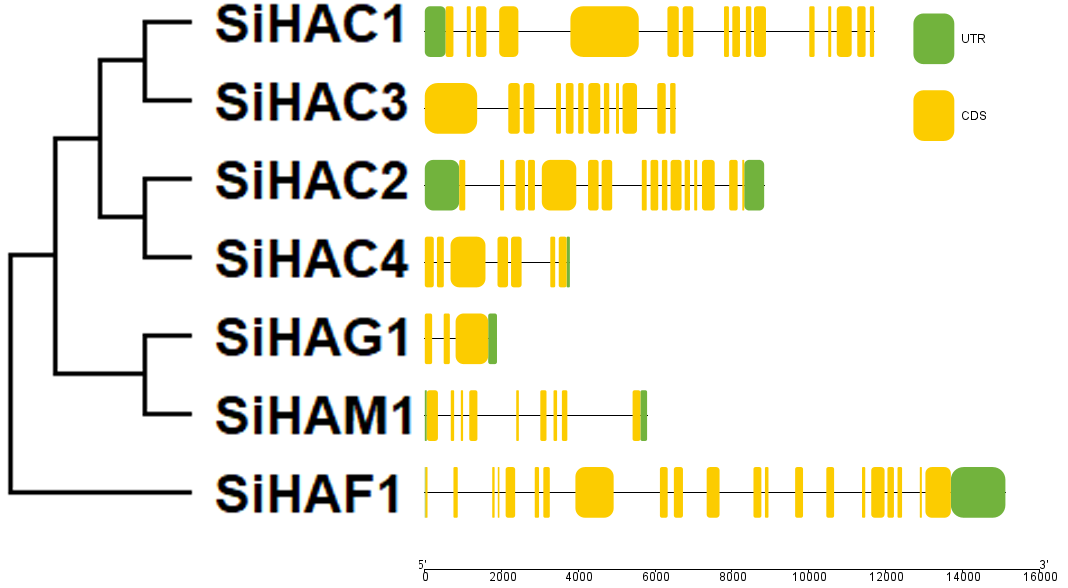


Figure S8-20 Gene structure analysis of *SiHDA,* *SiSRT* and *SiHDT* genes.


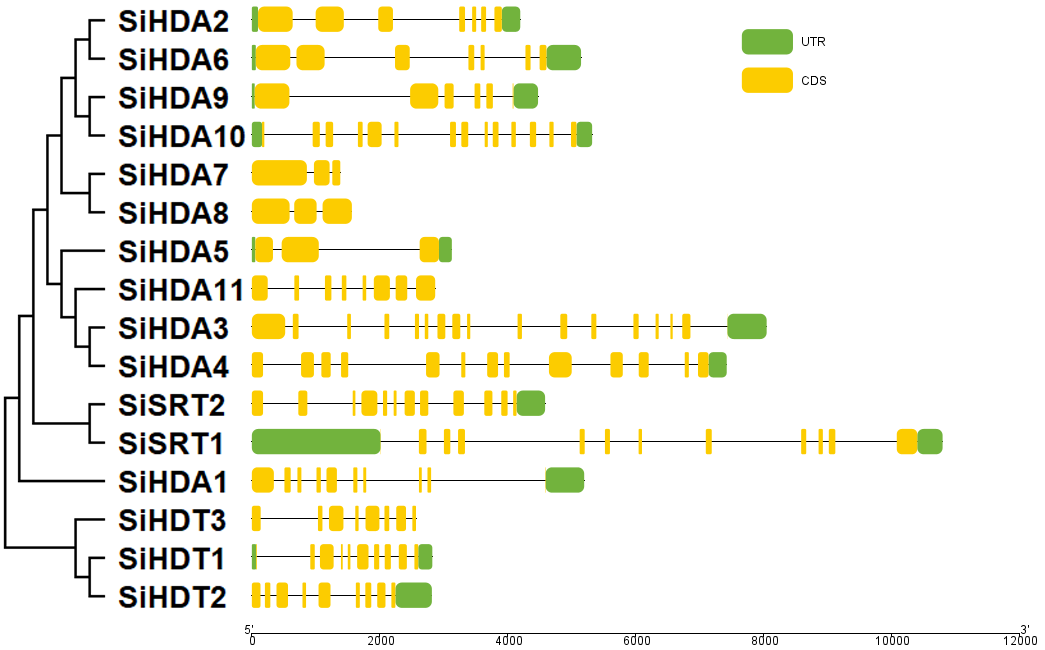


Figure S8-21 Gene structure analysis of *ZmSDG* and *ZmPRMT* genes.


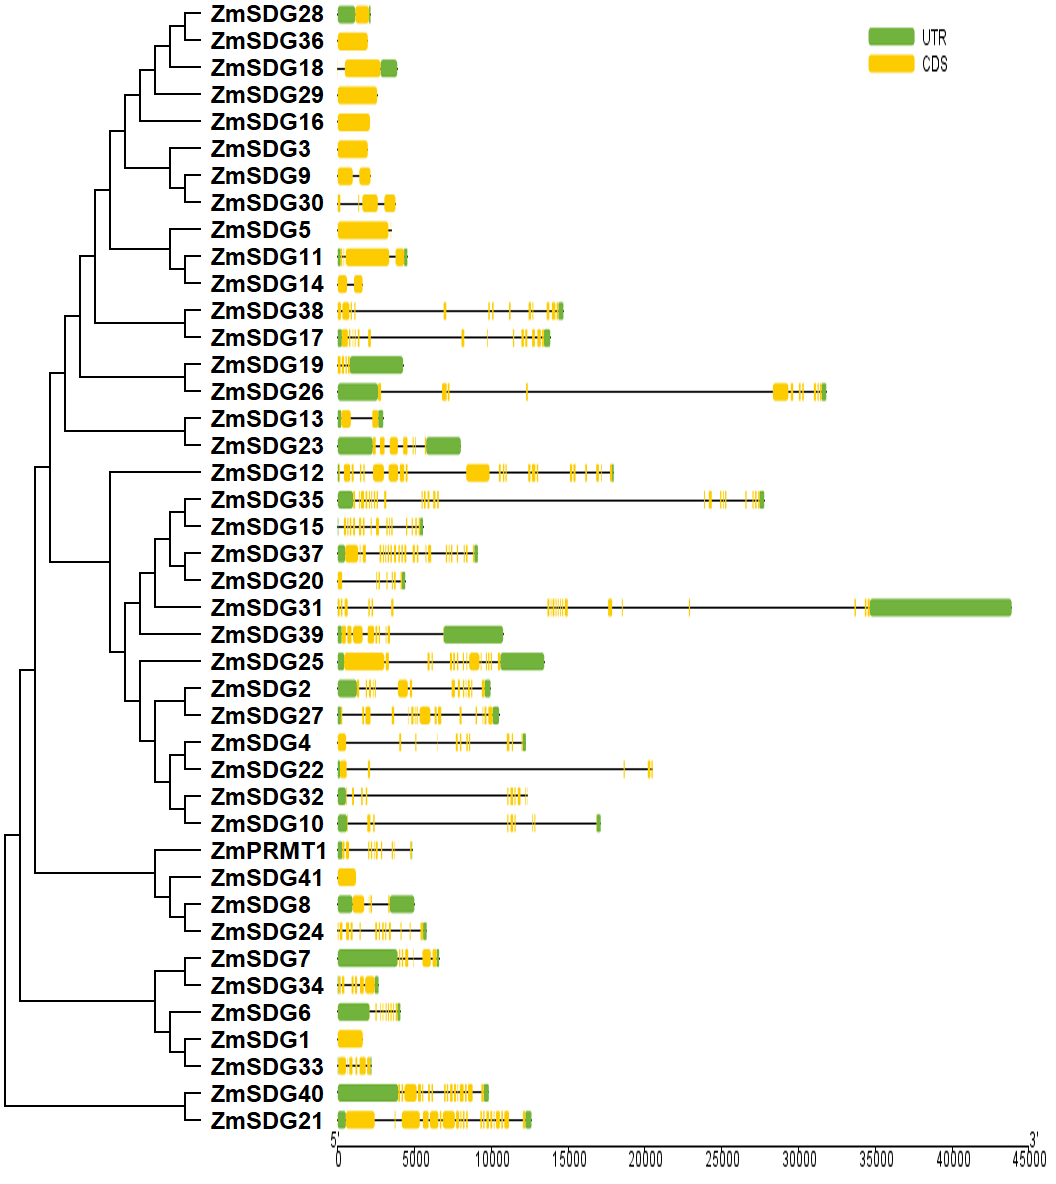


Figure S8-22 Gene structure analysis of *ZmHDMA* and *ZmJMJ* genes.


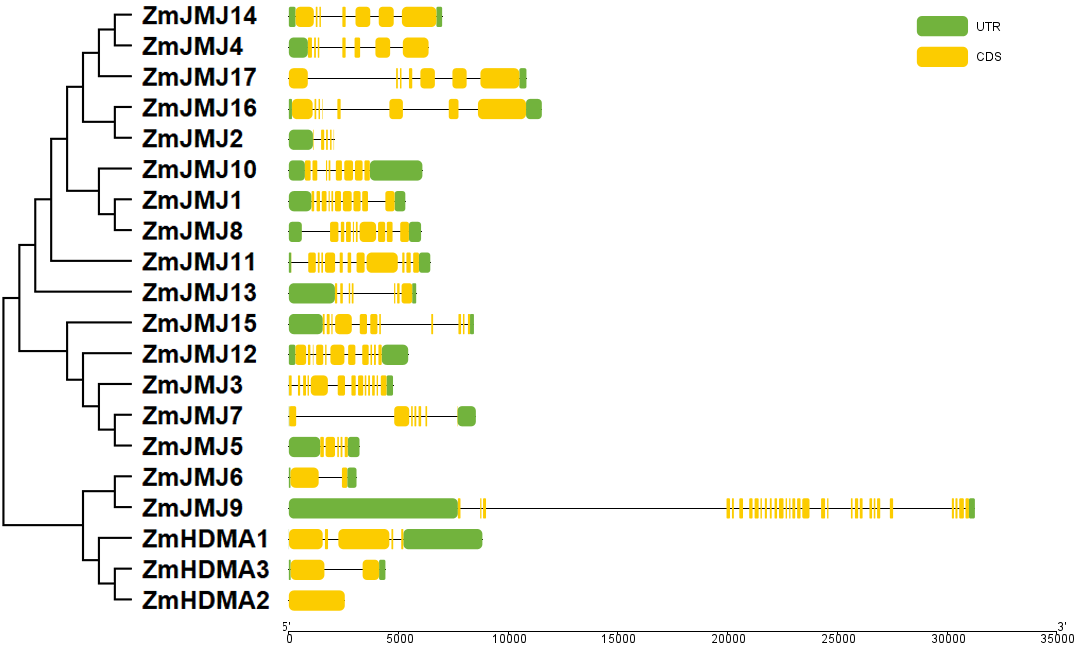


Figure S8-23 Gene structure analysis of *ZmHAG,* *ZmHAM*, *ZmHAC* and *ZmHAF* genes.


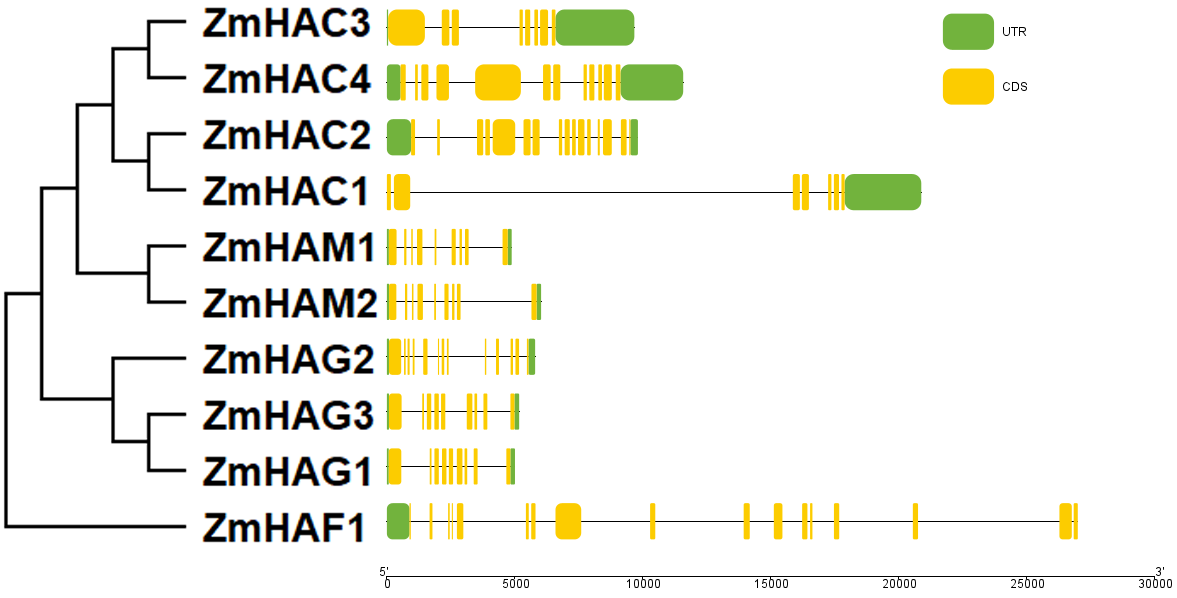


Figure S8-24 Gene structure analysis of *ZmHDA,* *ZmSRT* and *ZmHDT* genes.


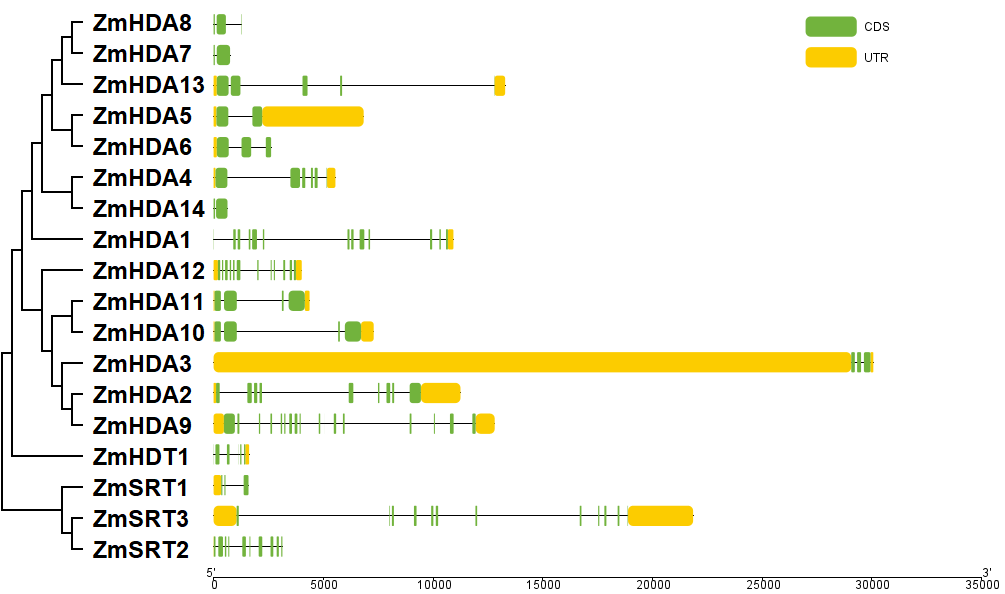

Supplement: Supplementary file 1 [file 01114c0fb238a41ea855b94a.docx]
