# Supplementary material for: Genome-wide Identification of Gramineae Histone Modification Genes and their Potential Roles in Regulating Wheat and Maize Growth and Stress Responses
Source: Research Square preprint supplement (doi:10.21203/rs.3.rs-101516/v1), 2020-11-10

**Figure S6 Synteny analysis of *HMs* genes between each gramineae specie and rice**

Figure S6-1 Synteny analysis of *HMs* genes between *T. aestivum* andrice

*
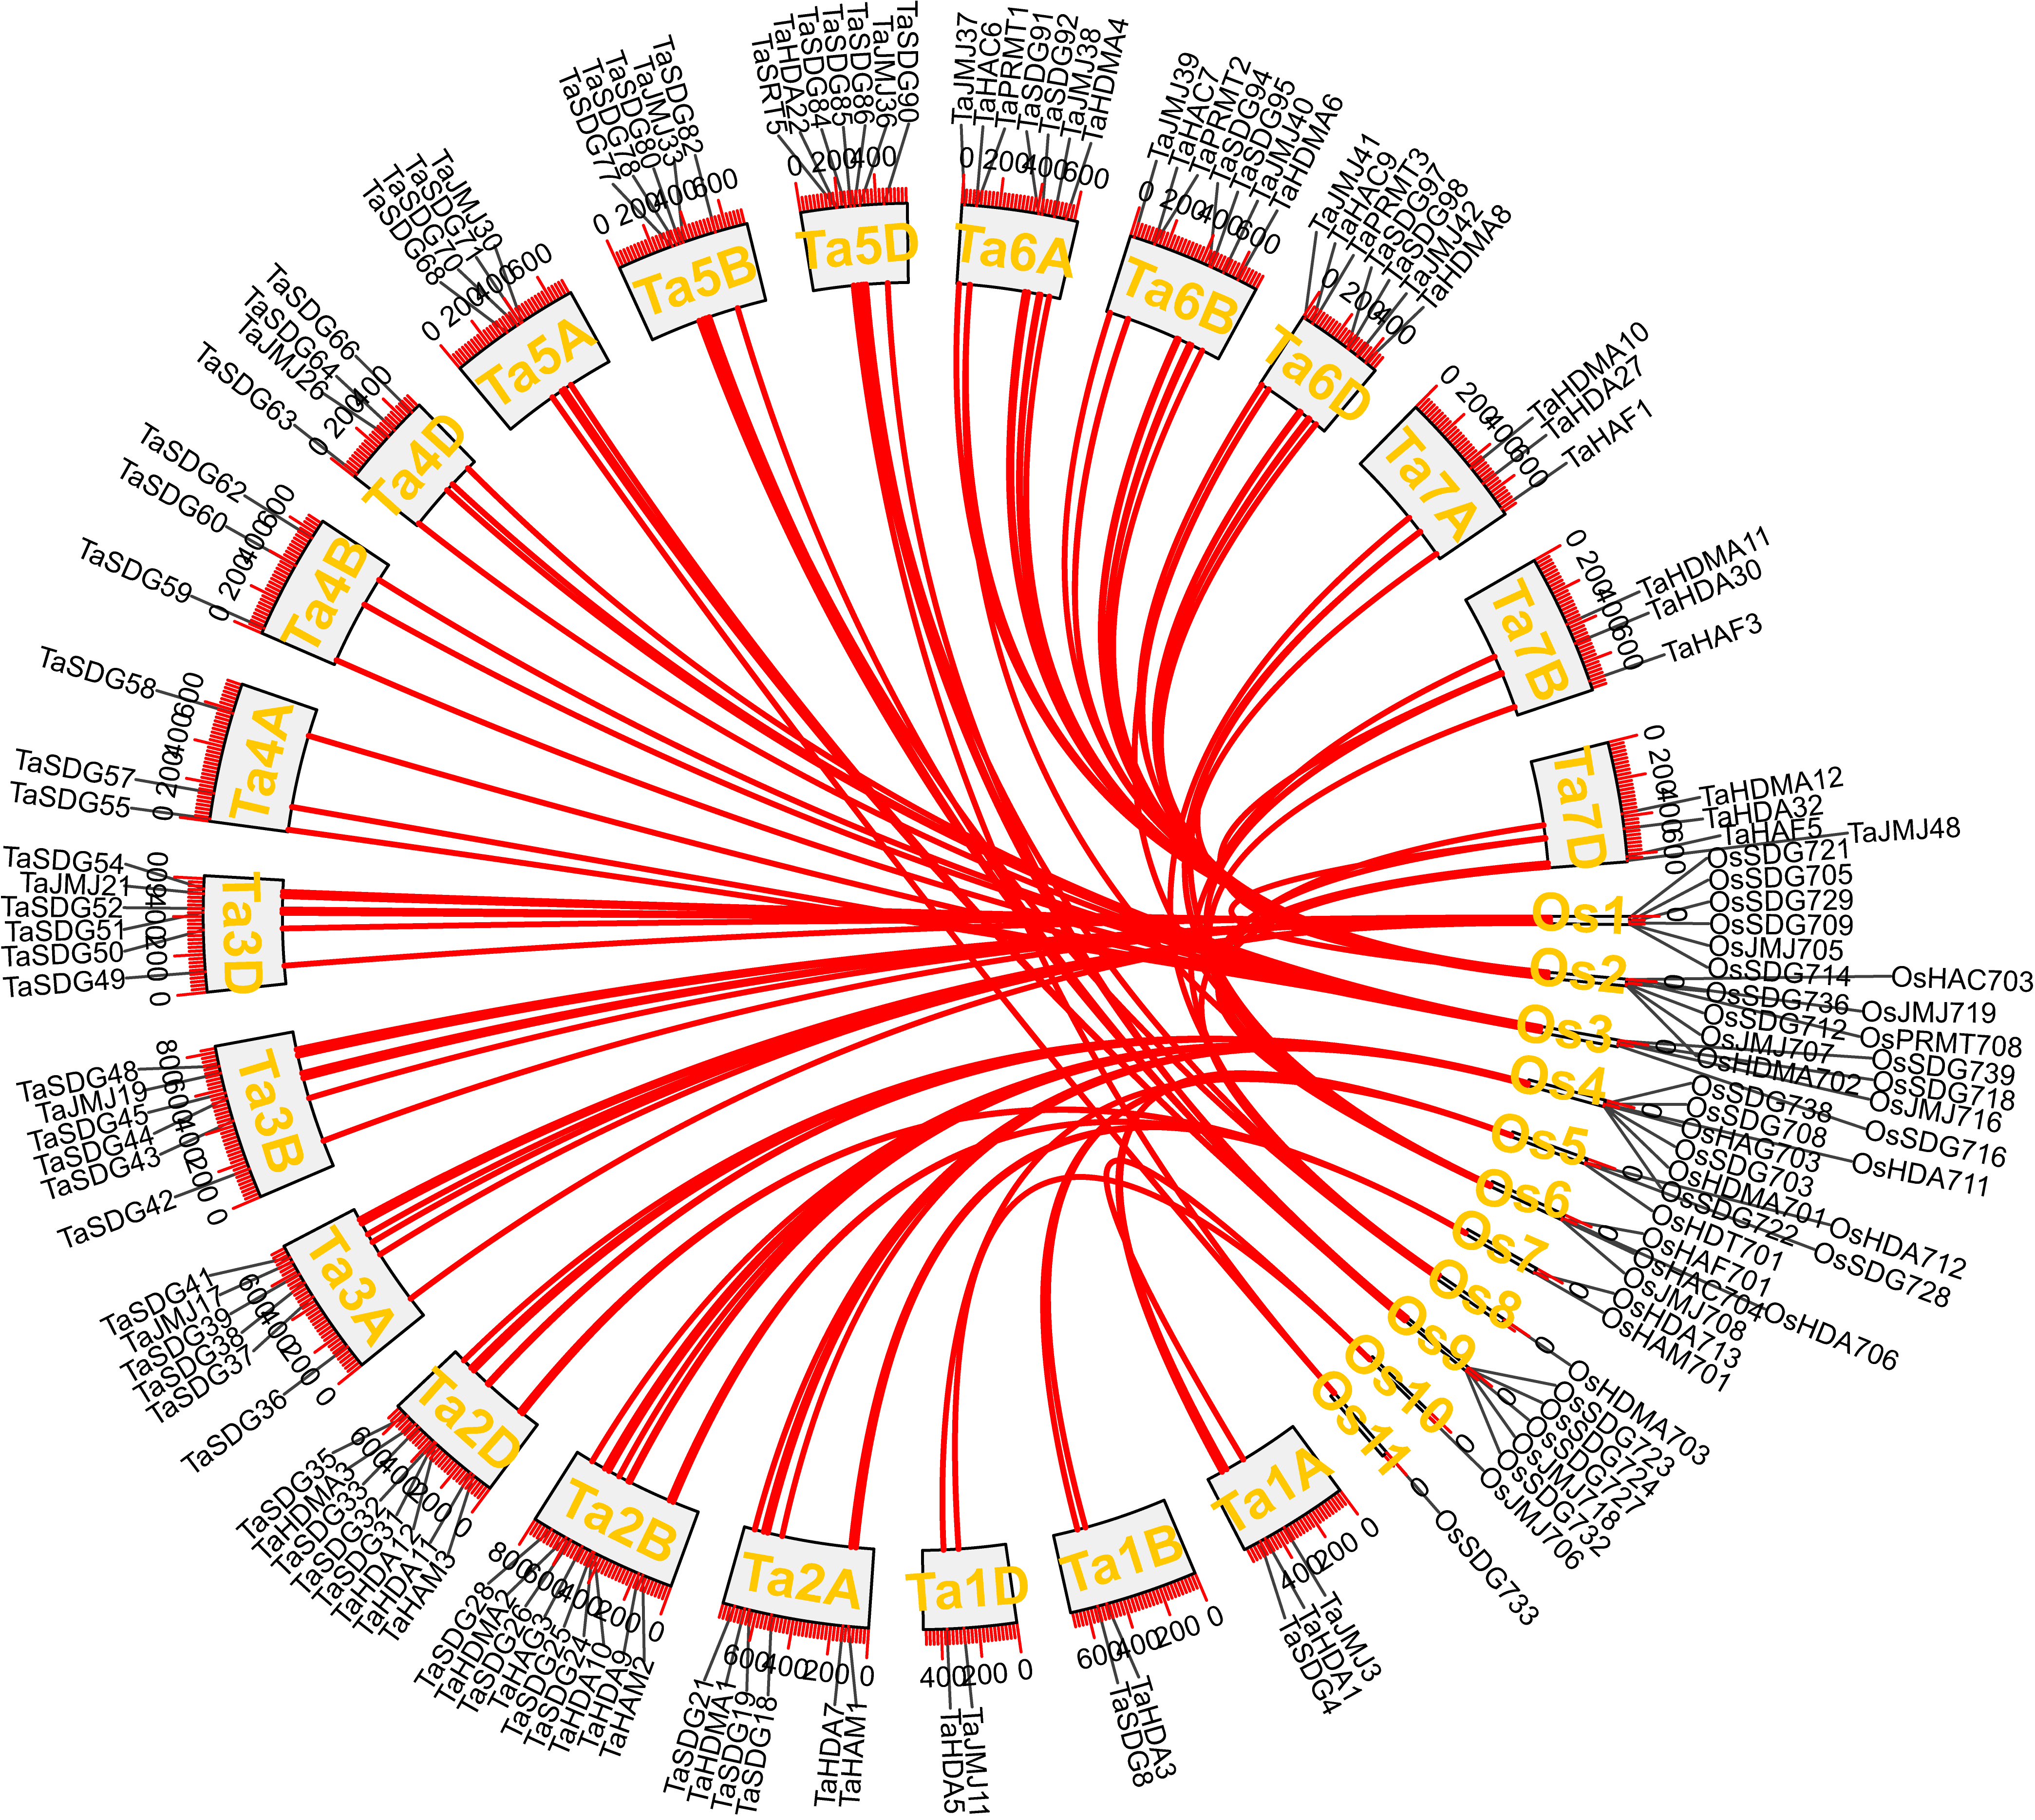
*

Figure S6-2 Synteny analysis of *HMs* genes between *H. vulgare* andrice


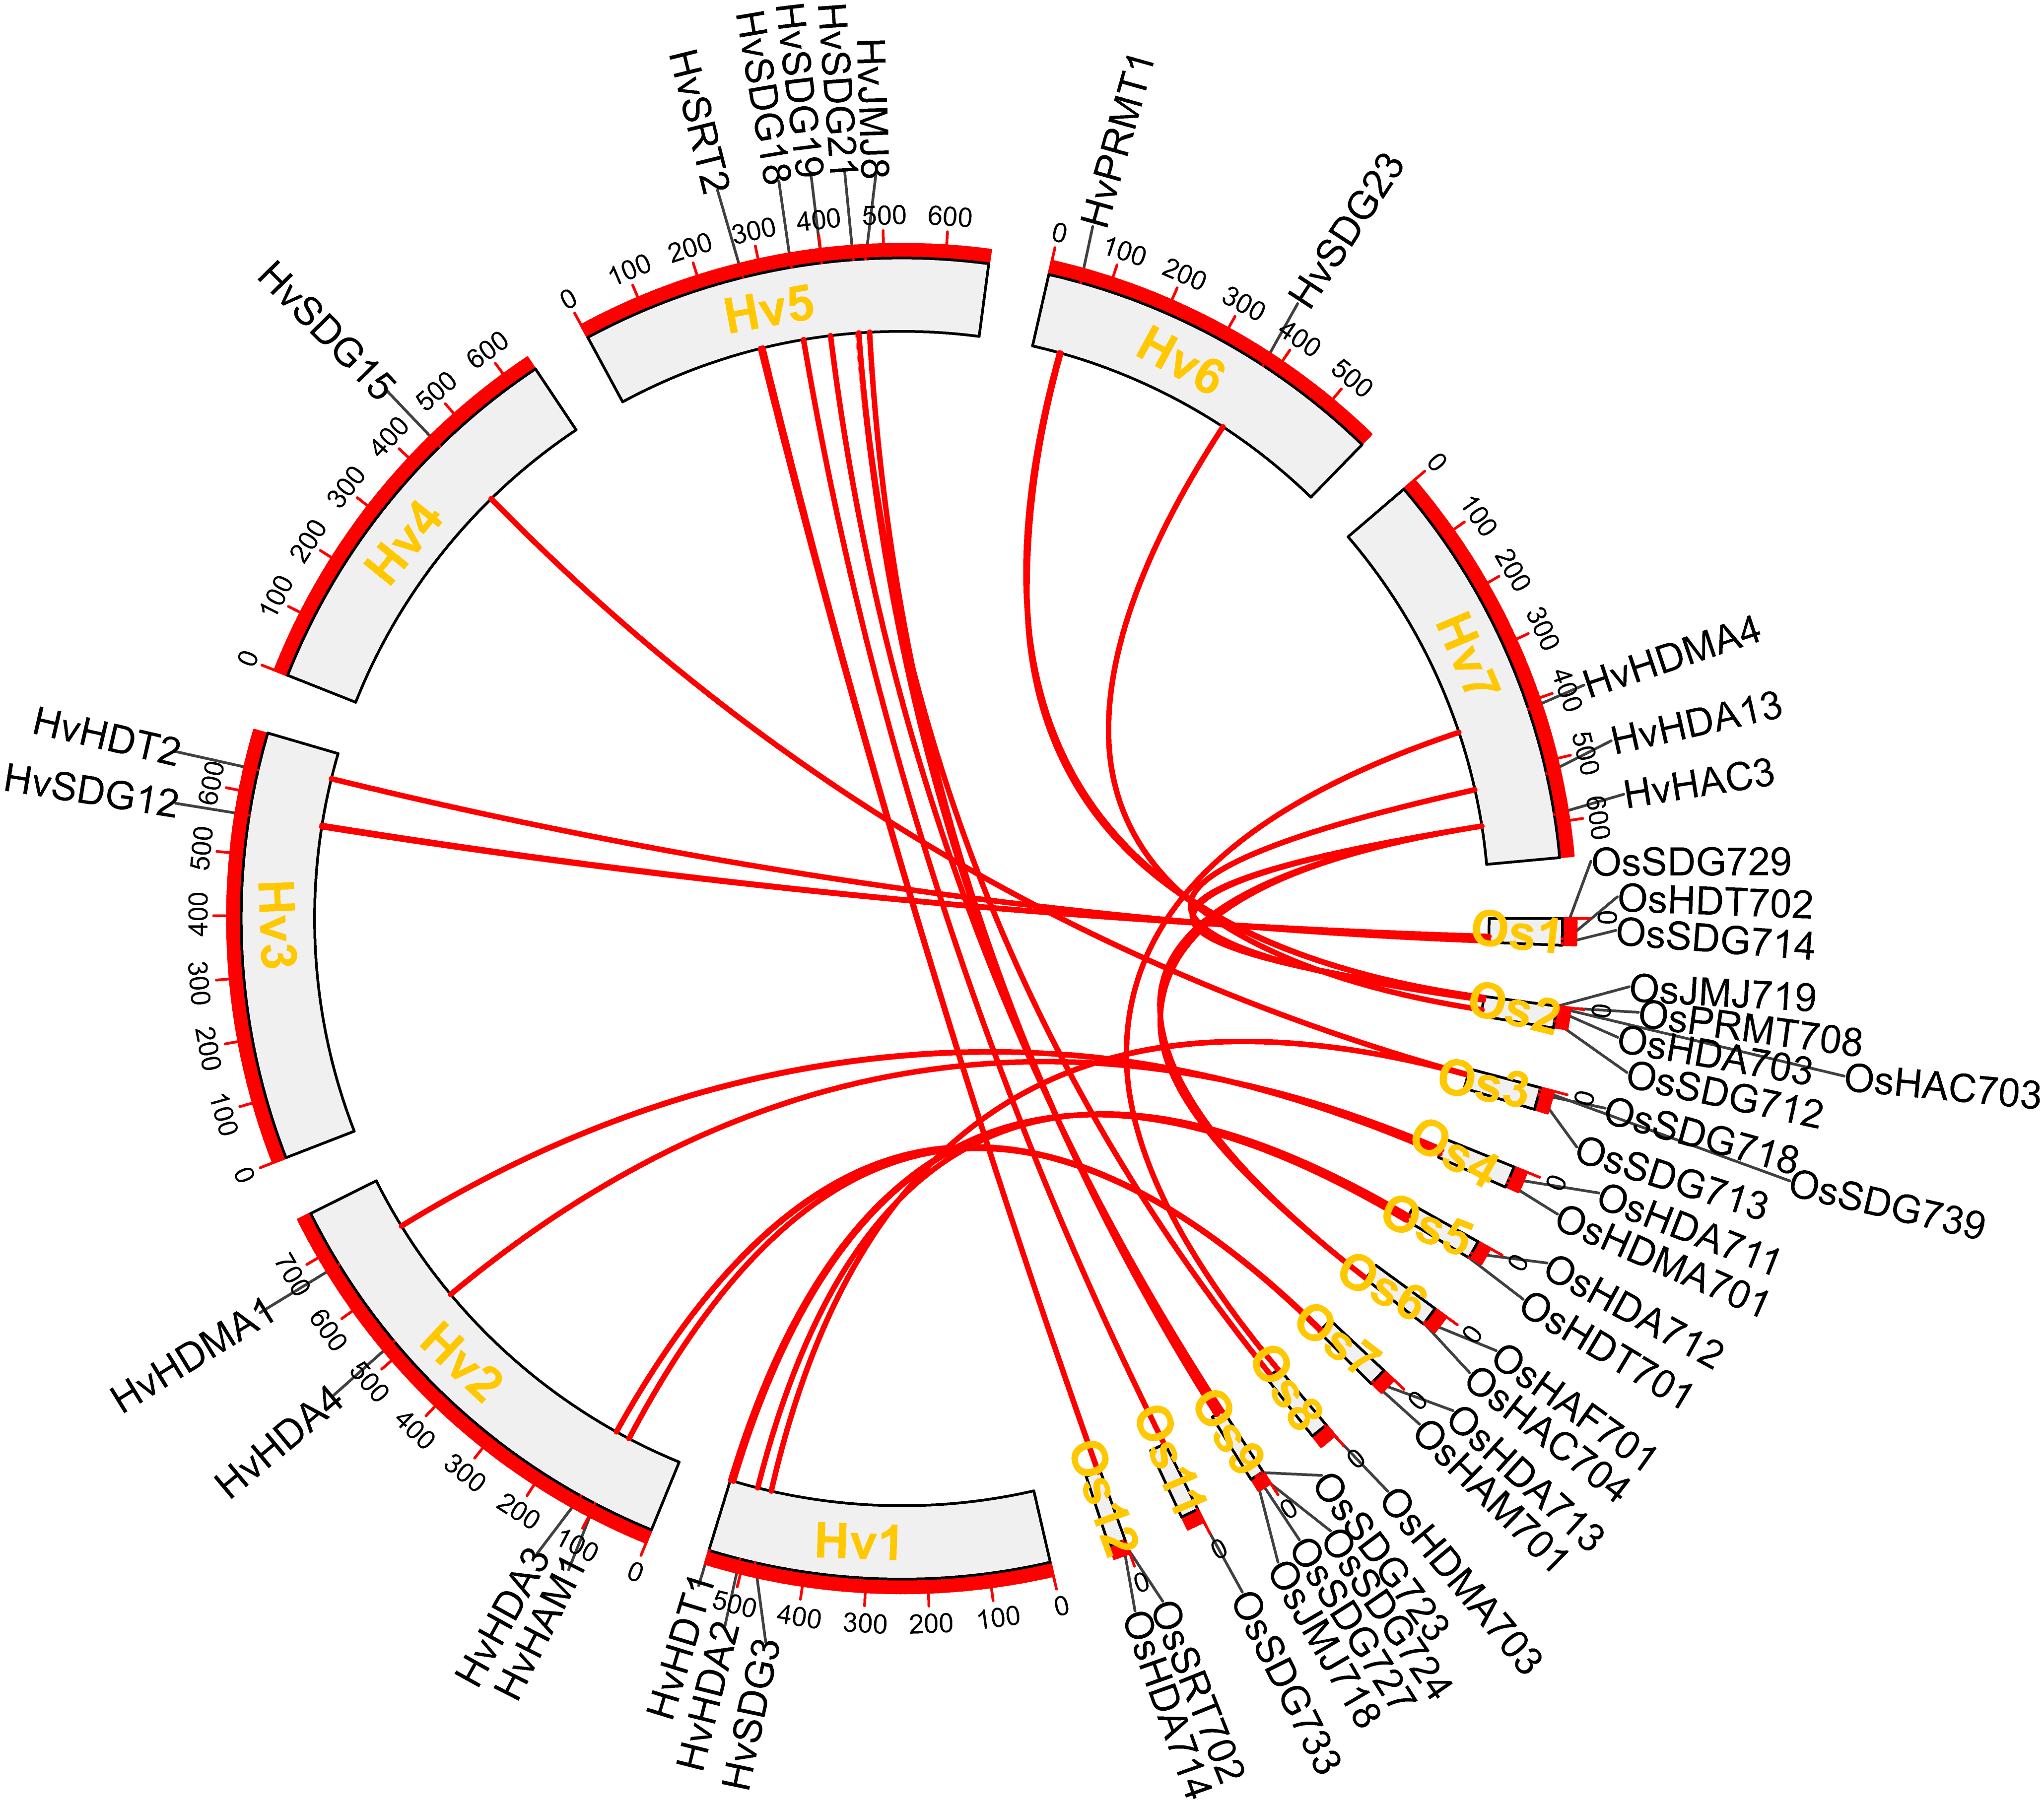


Figure S6-3 Synteny analysis of *HMs* genes between *S. bicolor* andrice


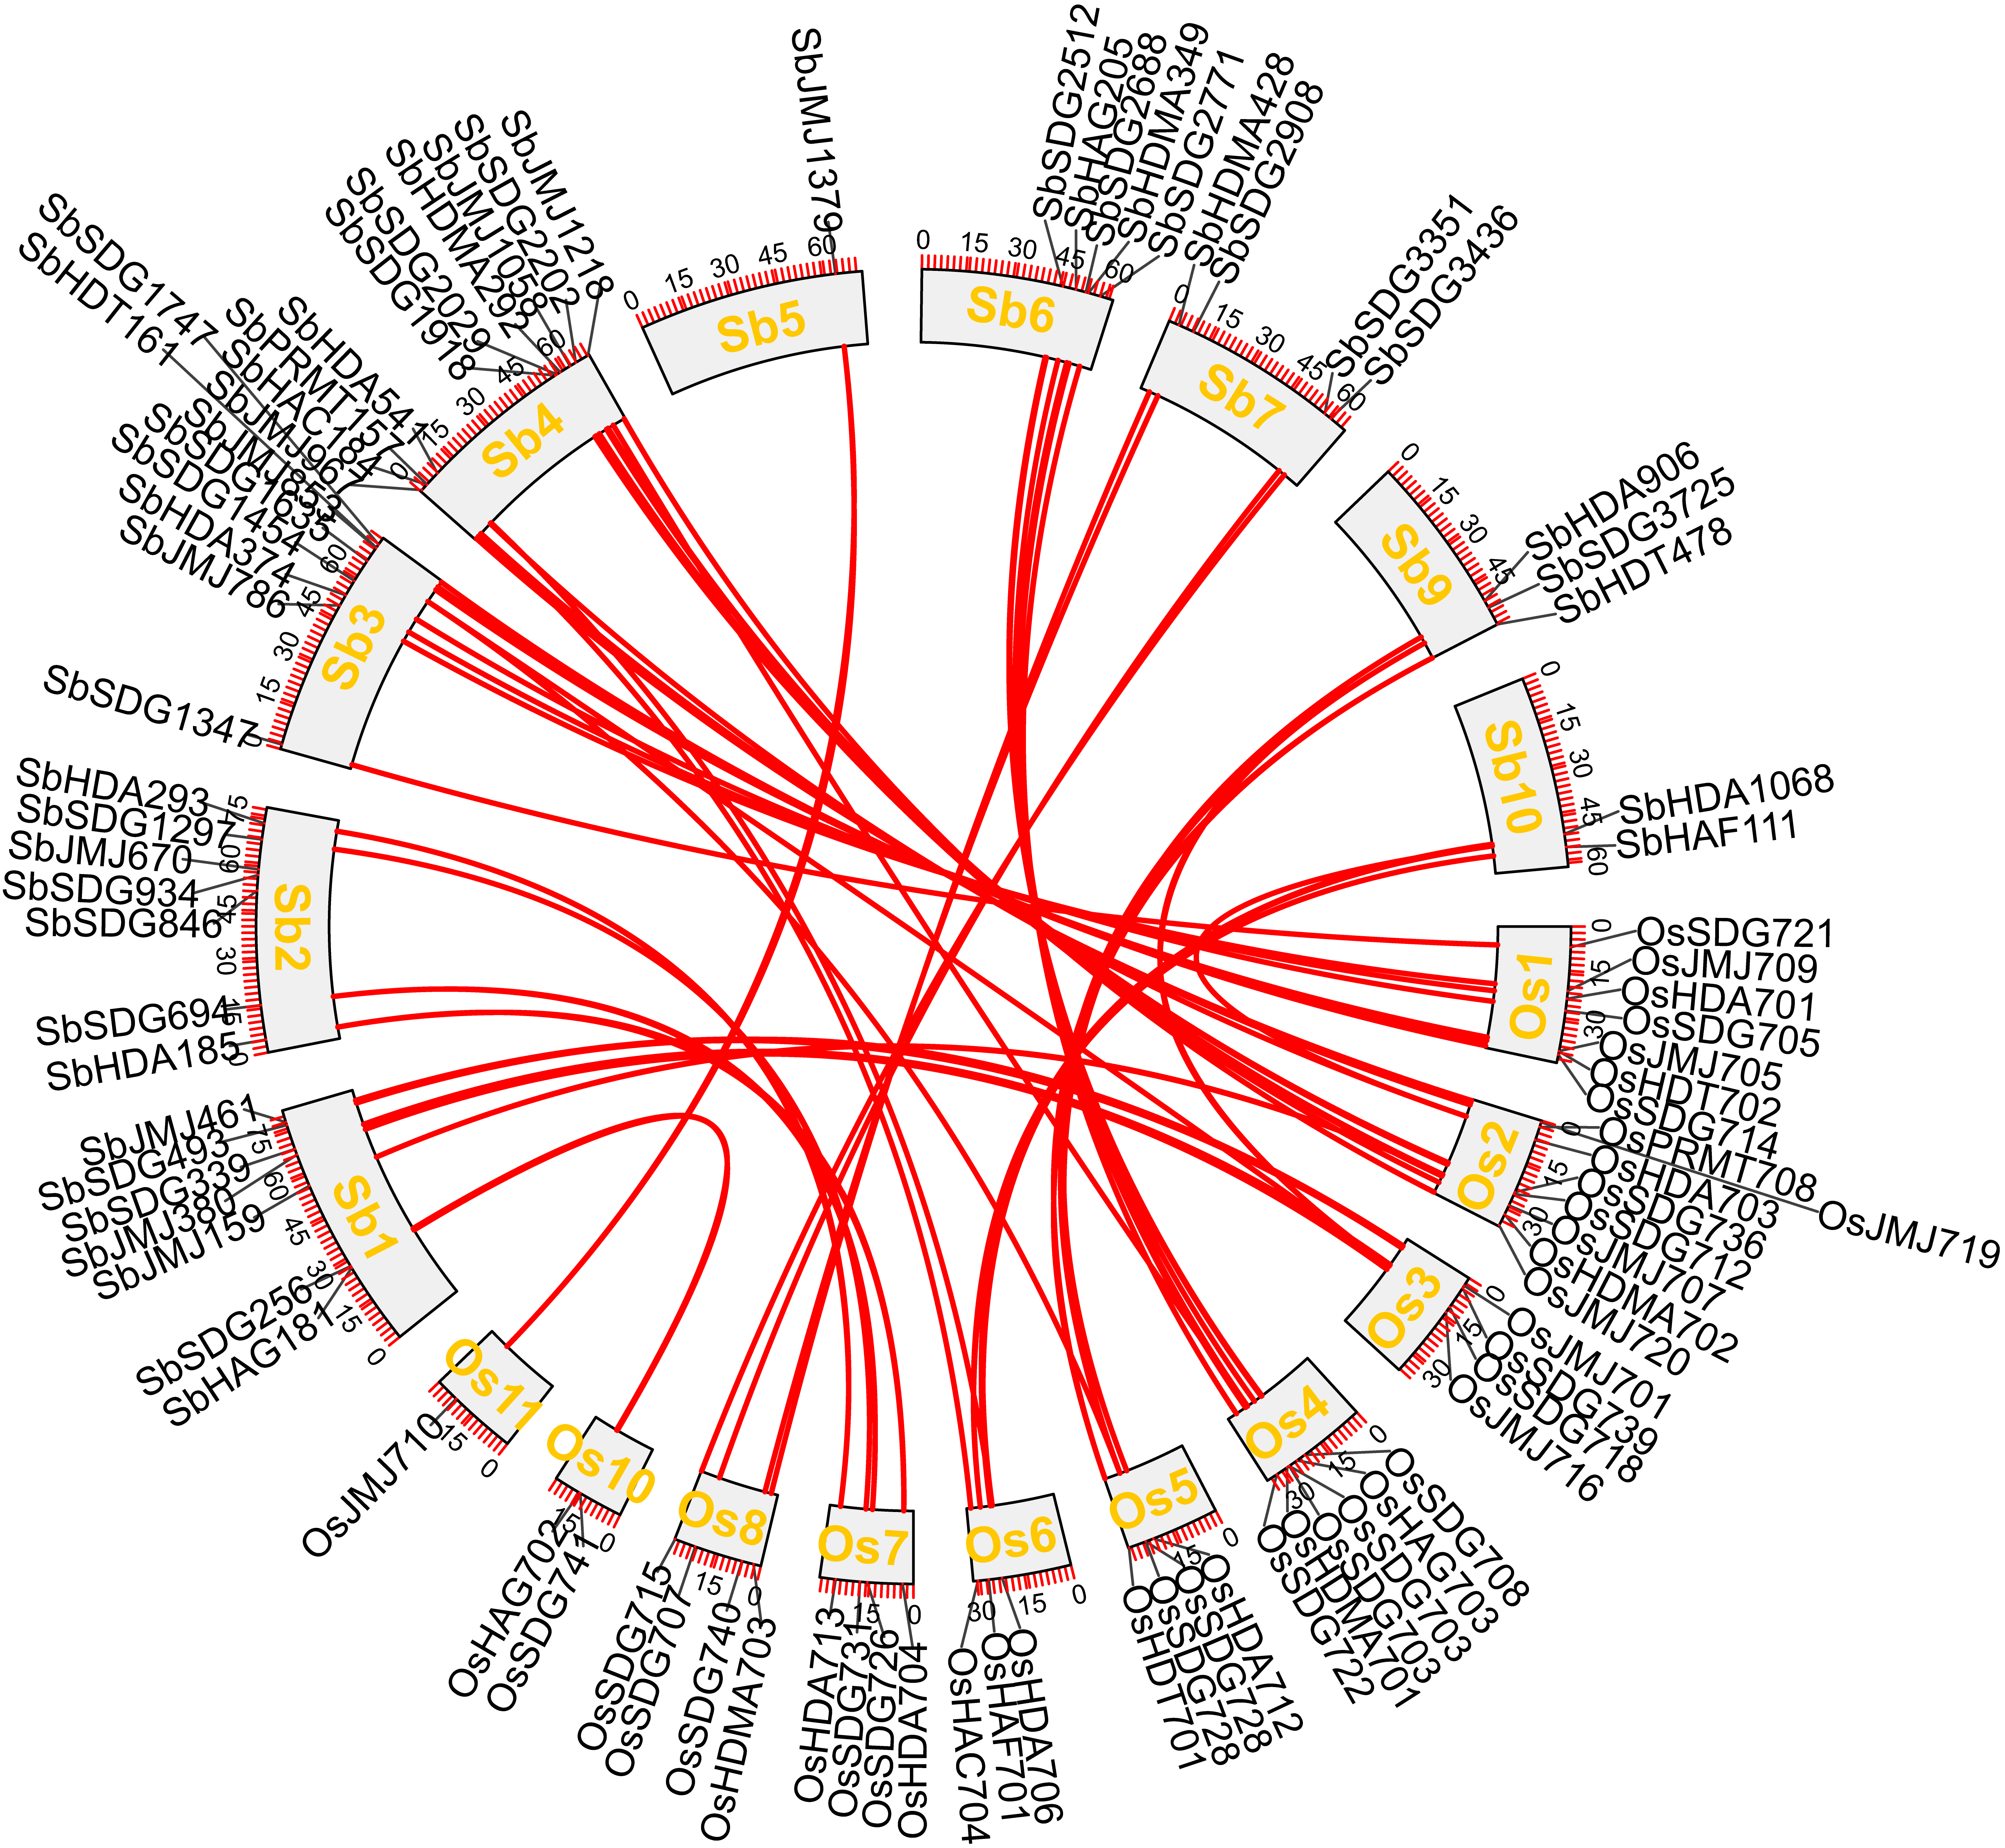


Figure S6-4 Synteny analysis of *HMs* genes between *S. viridis* andrice


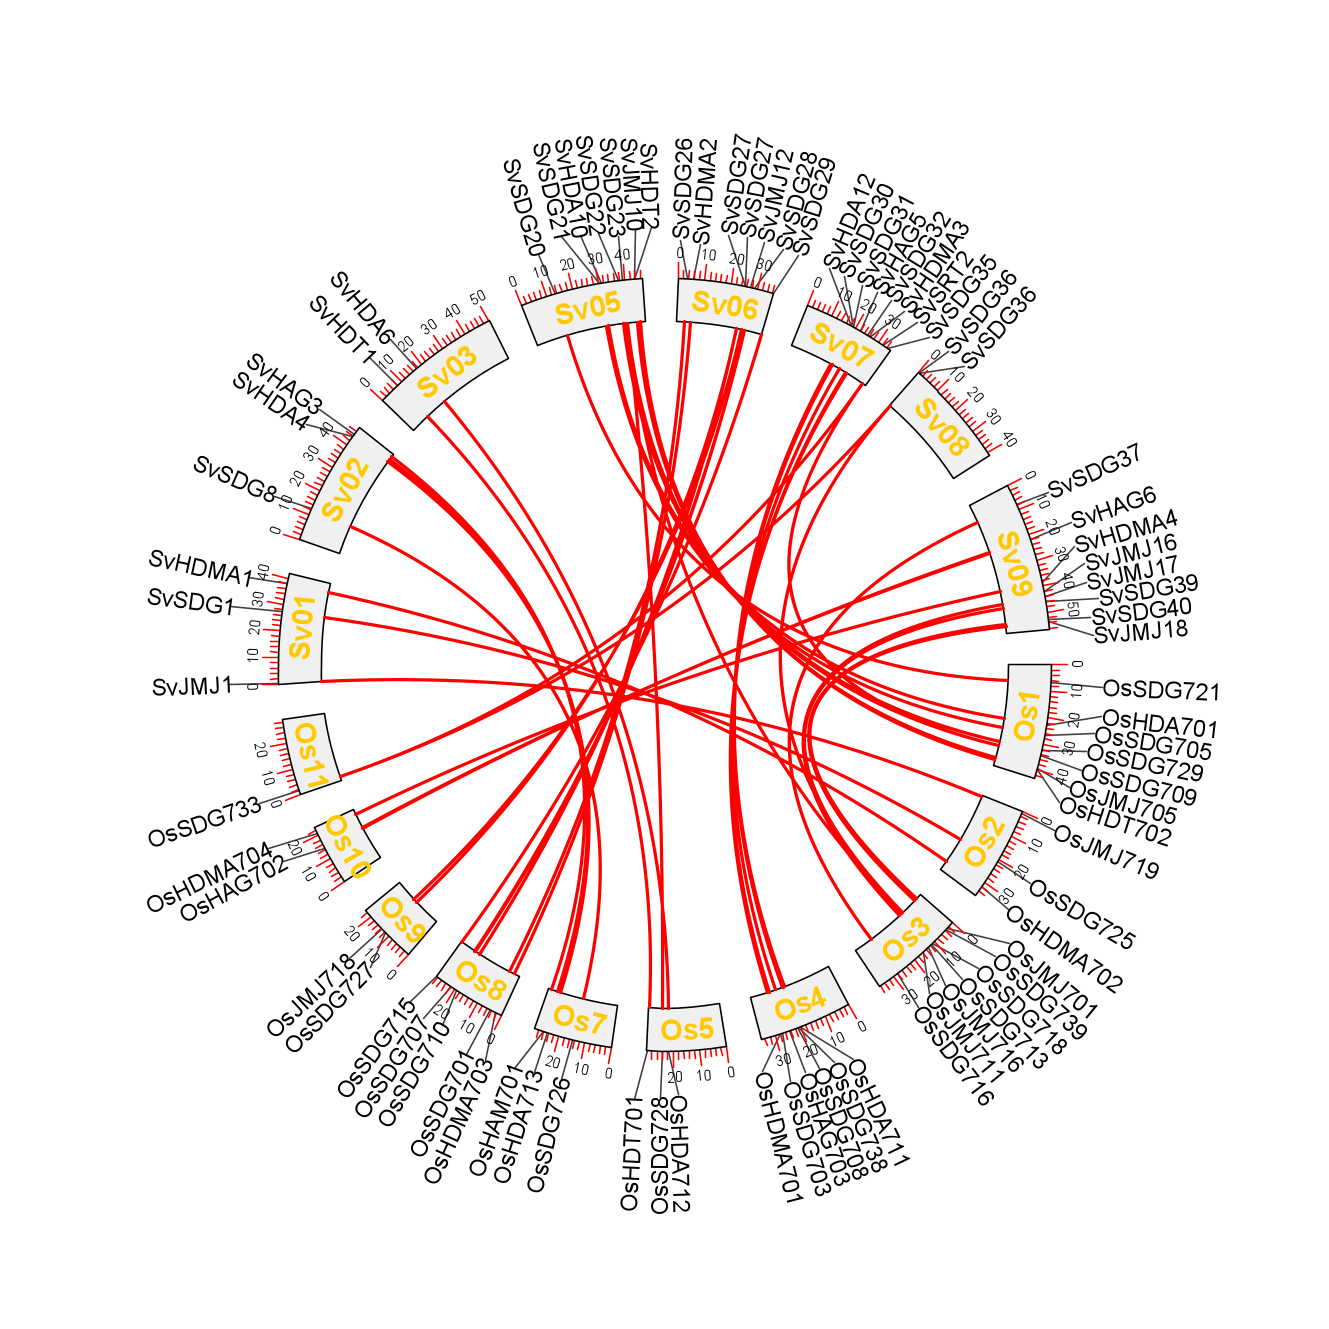


Figure S6-5 Synteny analysis of *HMs* genes between *S. italic* andrice


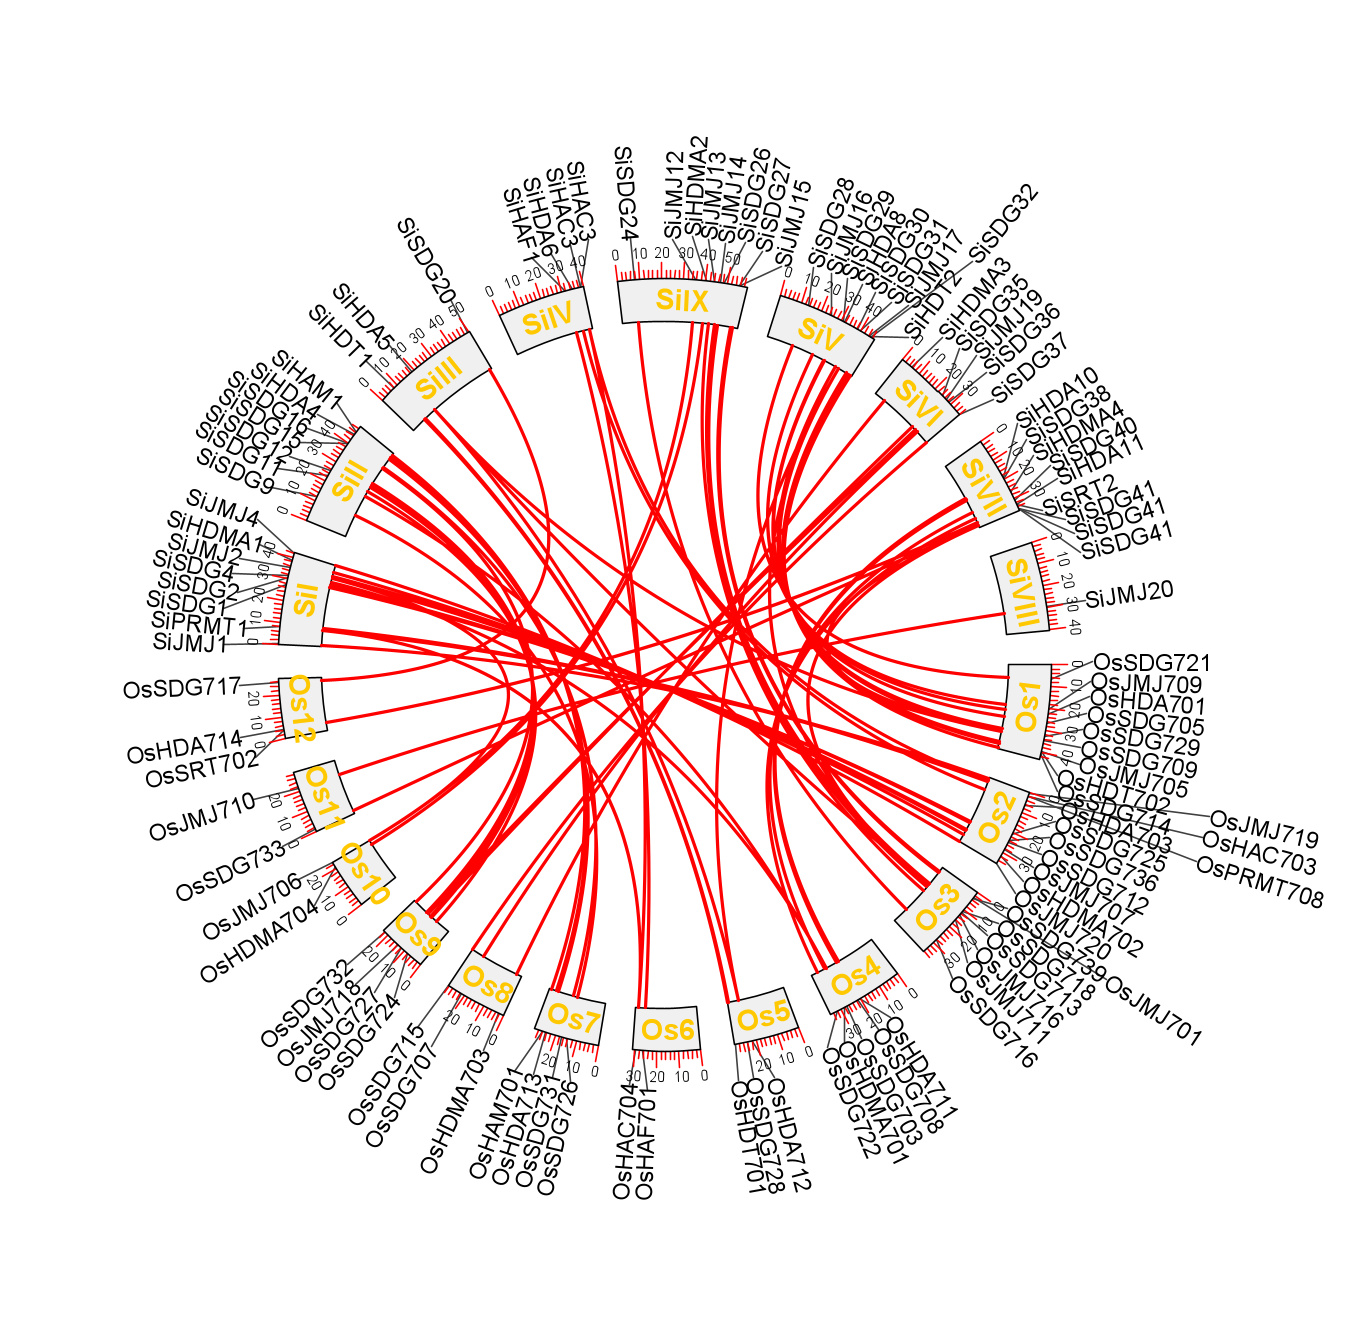


Figure S6-6 Synteny analysis of *HMs* genes between *Z. mays* andrice


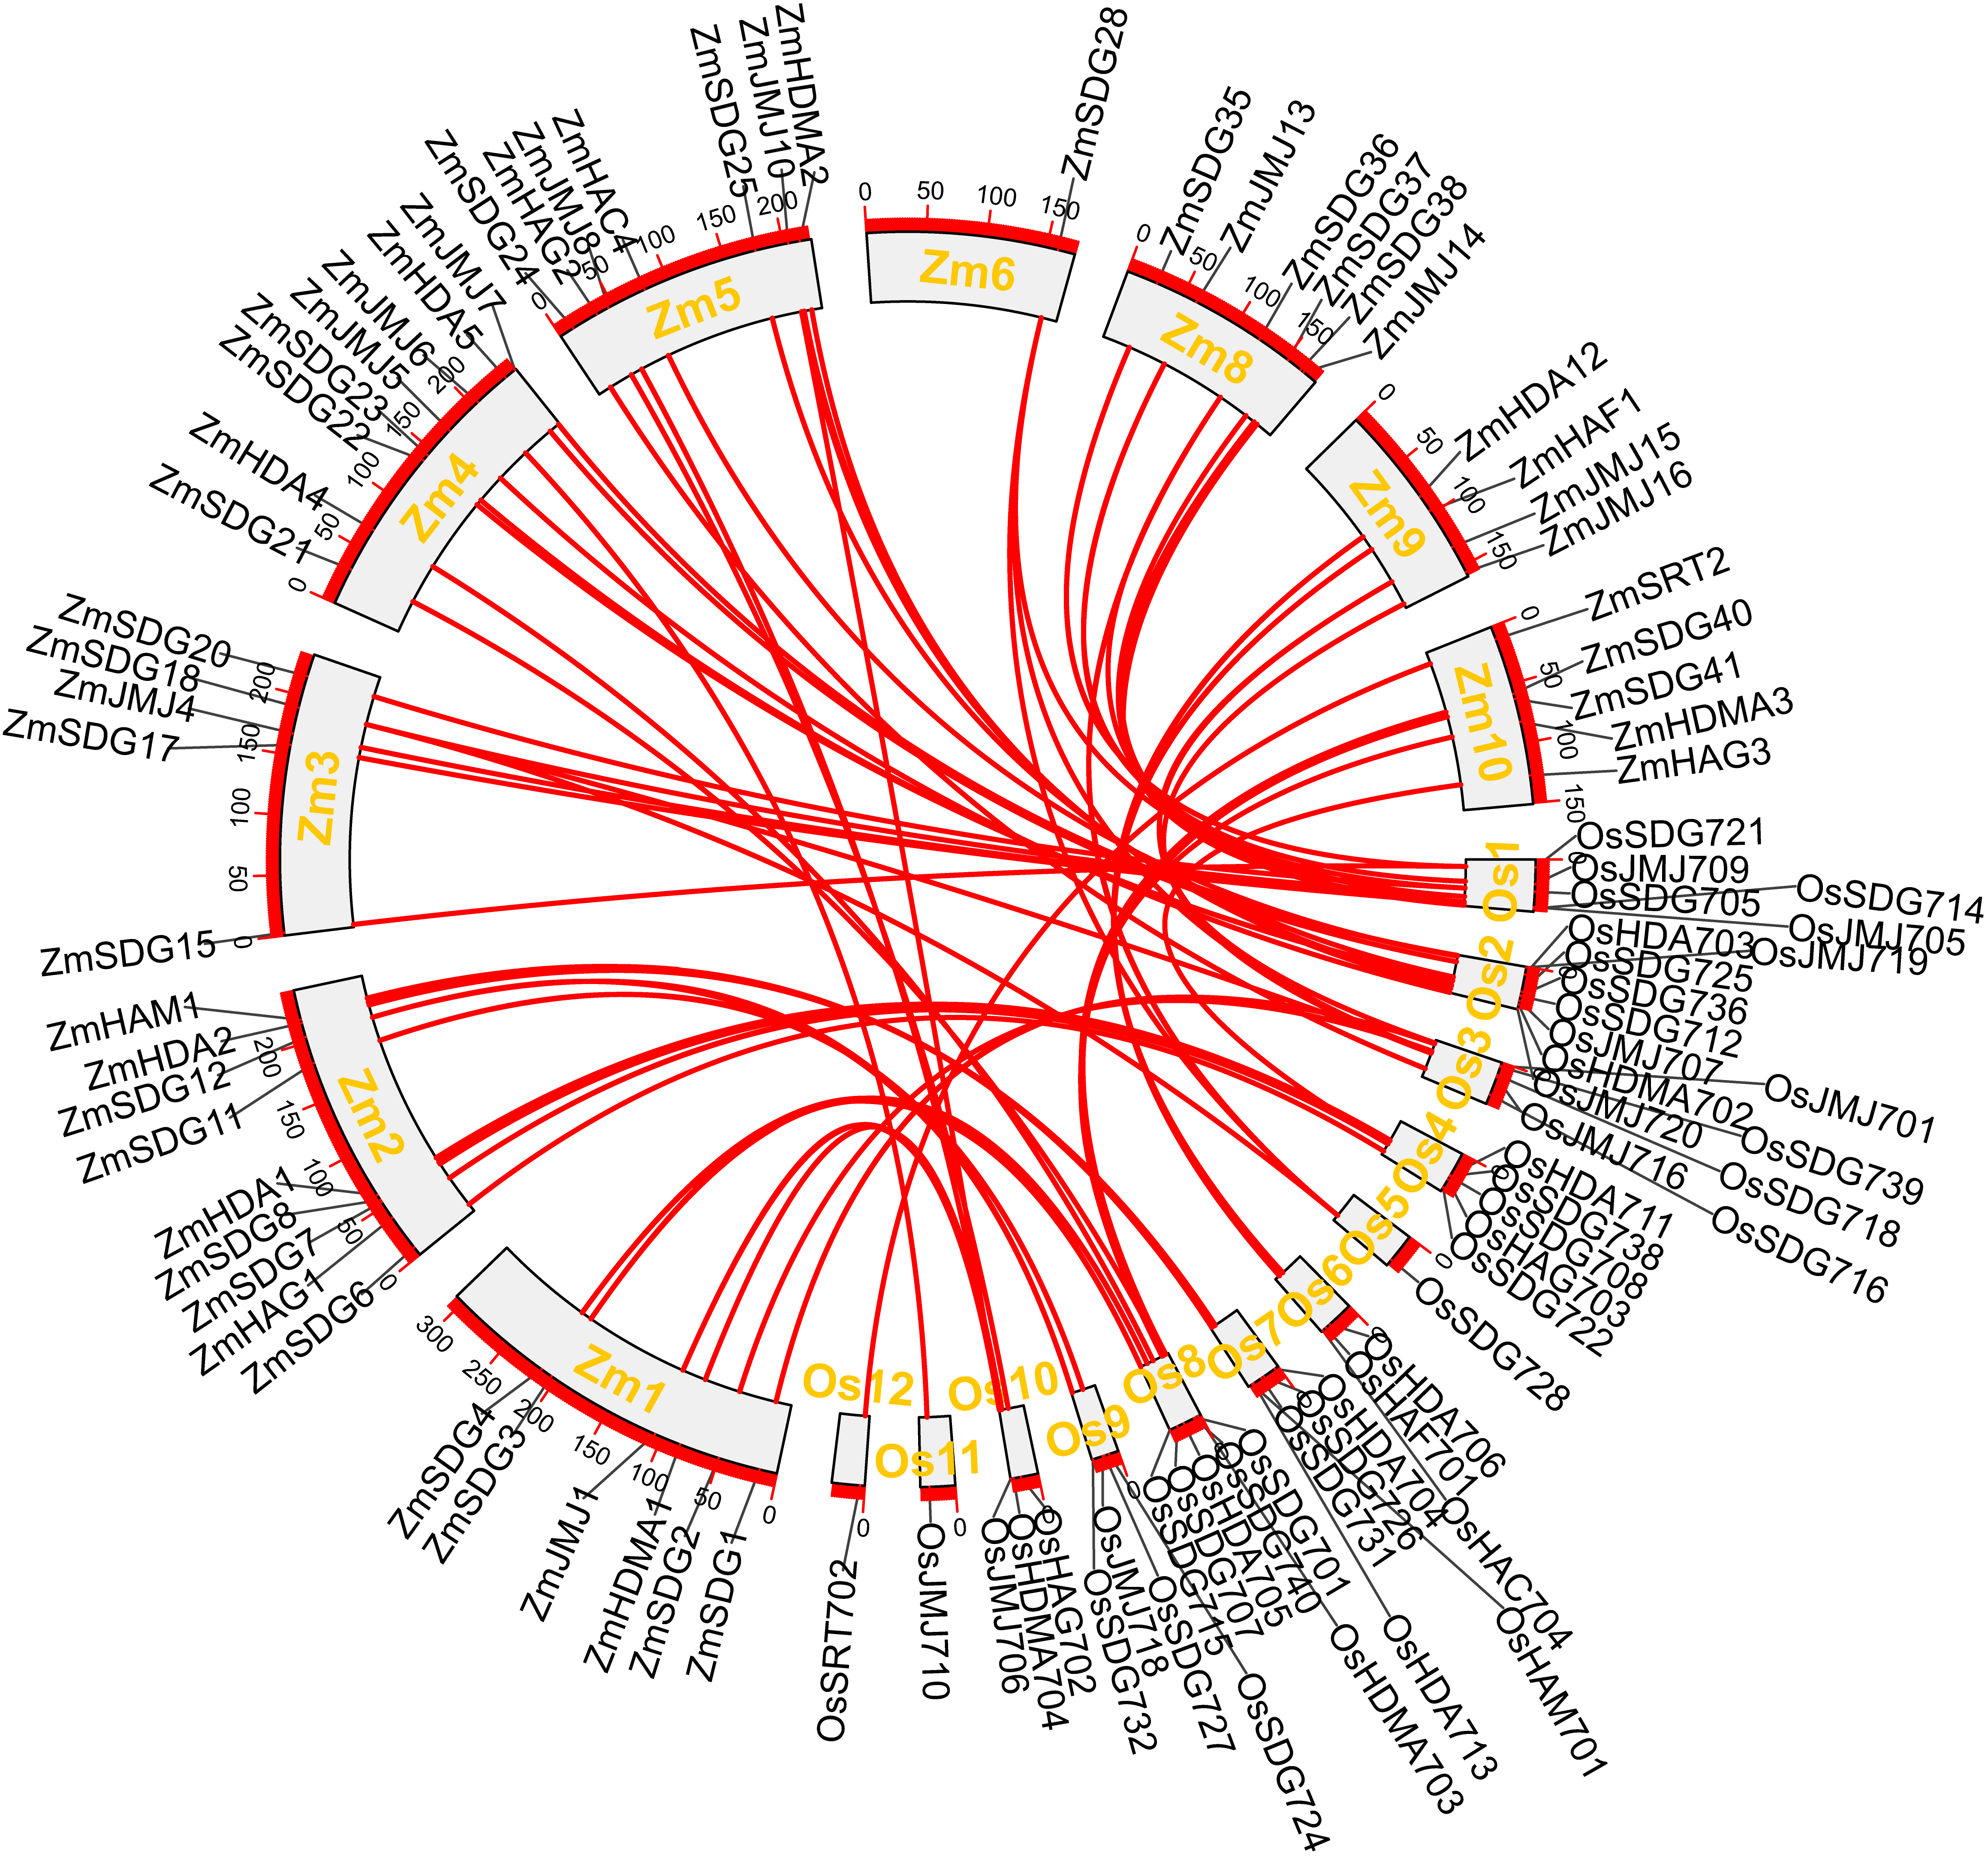

Supplement: Supplementary file 2 [file 63df44806e255b3ca5df0068.docx]
